# Supplementary material for: Influence of benzothiophene acceptor moieties on the non-linear optical properties of pyreno-based chromophores: first-principles DFT framework
Source: Royal Society of Chemistry journal article supplement (doi:10.1039/d4ra00903g), 2024-01-01
Supplement: d4ra00903g1.pdf [file d4ra00903g1.pdf]

## Influence of Benzothiophene Acceptor Moieties on Non-linear Optical Properties of Pyreno-Based Chromophores: First Principles DFT Framework

Iqra Shafiq<sup>1,2</sup>, Saadia Haq<sup>1,2</sup>, Tayyaba Javed<sup>1,2</sup>, Saifullah Bullo\*<sup>3</sup>, Sarfraz Ahmed,<sup>4</sup> Norah Alhokbany,<sup>5</sup> Tansir Ahamad<sup>5</sup>

<sup>1</sup>Institute of Chemistry, Khwaja Fareed University of Engineering & Information Technology, Rahim Yar Khan, 64200, Pakistan

<sup>2</sup>Centre for Theoretical and Computational Research, Khwaja Fareed University of Engineering & Information Technology, Rahim Yar Khan, 64200, Pakistan

<sup>3</sup>Department of Human and Rehabilitation Sciences, Begum Nusrat Bhutto Women University, Sukkur Sindh 65170 Pakistan

<sup>4</sup>Wellman Center for Photomedicine, Harvard Medical School, Massachusetts General Hospital, Boston, MA 02114, United States

<sup>5</sup>Department of Chemistry, College of Science, King Saud University, Saudi Arabia

\*Corresponding authors E-mail address:

Dr. Saifullah Bullo ([saifullah.bullo@bnbwu.edu.pk](mailto:saifullah.bullo@bnbwu.edu.pk))

**Table S1:** Cartesian coordinates of **PYFR** compound.

| Atom | X-axis    | Y-axis    | Z-axis    |
|------|-----------|-----------|-----------|
| C    | -6.173517 | 2.889816  | -0.316649 |
| C    | -4.929739 | 2.280545  | -0.220052 |
| C    | -4.819368 | 0.893489  | -0.090428 |
| C    | -6.007975 | 0.099053  | -0.090051 |
| C    | -7.27005  | 0.744911  | -0.178333 |
| C    | -7.331209 | 2.137578  | -0.286519 |
| C    | -5.960092 | -1.329768 | -0.017058 |
| C    | -4.721467 | -2.022753 | 0.039196  |
| C    | -3.534522 | -1.222643 | 0.04566   |
| C    | -4.699175 | -3.412646 | 0.095802  |
| H    | -3.738856 | -3.917053 | 0.139678  |
| C    | -5.885707 | -4.133915 | 0.101671  |
| C    | -7.103577 | -3.478359 | 0.047711  |
| C    | -7.164031 | -2.082171 | -0.015163 |
| C    | -8.415657 | -1.392339 | -0.08362  |
| C    | -8.464344 | -0.044194 | -0.164256 |
| H    | -9.417799 | 0.47412   | -0.224557 |
| H    | -9.32833  | -1.982522 | -0.076076 |
| H    | -6.23047  | 3.969122  | -0.416255 |
| H    | -4.040922 | 2.899161  | -0.254461 |

|   |           |           |           |
|---|-----------|-----------|-----------|
| H | -8.30434  | 2.616283  | -0.35587  |
| H | -5.856847 | -5.218015 | 0.149021  |
| H | -8.032559 | -4.042415 | 0.050715  |
| C | -3.592949 | 0.158576  | 0.019129  |
| C | -1.501261 | -0.573351 | 0.113821  |
| C | -0.037131 | -0.59276  | 0.137359  |
| C | 0.617194  | -1.667095 | -0.472532 |
| C | 0.741853  | 0.387947  | 0.757192  |
| C | 1.997117  | -1.74233  | -0.488249 |
| H | 0.022335  | -2.436987 | -0.952827 |
| C | 2.122171  | 0.305871  | 0.741595  |
| H | 0.273401  | 1.216032  | 1.277662  |
| C | 2.781797  | -0.751215 | 0.10965   |
| H | 2.476968  | -2.569568 | -1.003317 |
| H | 2.700512  | 1.067928  | 1.255616  |
| N | -2.273256 | 0.572374  | 0.075596  |
| N | -2.242229 | -1.659272 | 0.094479  |
| C | 4.254628  | -0.809352 | 0.076307  |
| C | 5.005643  | 0.367387  | -0.04017  |
| C | 4.926851  | -2.036025 | 0.16341   |
| H | 4.500654  | 1.325616  | -0.136668 |
| C | 6.310547  | -2.105655 | 0.141147  |
| H | 4.349488  | -2.949191 | 0.277289  |
| C | 7.042194  | -0.930256 | 0.026983  |
| H | 6.810791  | -3.066974 | 0.221353  |
| C | 6.384062  | 0.304232  | -0.065614 |
| C | 7.388776  | 1.41432   | -0.195585 |
| H | 7.300666  | 2.146164  | 0.617604  |
| H | 7.258865  | 1.975716  | -1.129837 |
| C | 8.481112  | -0.695469 | -0.024906 |
| C | 8.701699  | 0.683571  | -0.156568 |
| C | 9.99056   | 1.181424  | -0.230116 |
| C | 11.060188 | 0.292933  | -0.170078 |
| H | 10.167311 | 2.248897  | -0.33257  |
| C | 9.549606  | -1.582021 | 0.034906  |
| C | 10.84044  | -1.07607  | -0.038268 |
| H | 12.076867 | 0.669965  | -0.225862 |
| H | 9.37995   | -2.650631 | 0.136906  |
| H | 11.688249 | -1.752819 | 0.007149  |
| C | -1.814077 | 1.924446  | 0.083261  |
| C | -1.928149 | 2.670836  | 1.248434  |
| C | -1.273269 | 2.472511  | -1.069217 |
| C | -1.495621 | 3.987746  | 1.256737  |

|   |           |          |           |
|---|-----------|----------|-----------|
| H | -2.358874 | 2.212706 | 2.134354  |
| C | -0.837499 | 3.790289 | -1.052024 |
| H | -1.197799 | 1.864704 | -1.96574  |
| C | -0.950173 | 4.546771 | 0.106851  |
| H | -1.582666 | 4.578972 | 2.162269  |
| H | -0.412017 | 4.228269 | -1.949002 |
| H | -0.611446 | 5.577635 | 0.114733  |

**Table S2:** Cartesian coordinates of **PYFD1** compound.

| <b>Atom</b> | <b>X-axis</b> | <b>Y-axis</b> | <b>Z-axis</b> |
|-------------|---------------|---------------|---------------|
| C           | -12.845301    | -1.289396     | 1.369676      |
| C           | -11.494762    | -1.117557     | 1.096479      |
| C           | -11.014975    | 0.08848       | 0.579886      |
| C           | -11.933149    | 1.164869      | 0.364347      |
| C           | -13.31068     | 0.964717      | 0.646193      |
| C           | -13.746518    | -0.268214     | 1.14083       |
| C           | -11.500212    | 2.442126      | -0.114652     |
| C           | -10.131917    | 2.696757      | -0.392125     |
| C           | -9.220376     | 1.612451      | -0.189553     |
| C           | -9.728869     | 3.949847      | -0.841857     |
| H           | -8.676225     | 4.118215      | -1.046303     |
| C           | -10.661986    | 4.961376      | -1.026455     |
| C           | -12.002004    | 4.734082      | -0.765323     |
| C           | -12.442194    | 3.487192      | -0.309195     |
| C           | -13.822829    | 3.239847      | -0.028116     |
| C           | -14.235054    | 2.036259      | 0.427909      |
| H           | -15.284287    | 1.854706      | 0.645974      |
| H           | -14.532846    | 4.047358      | -0.186365     |
| H           | -13.190271    | -2.238321     | 1.76812       |
| H           | -10.812654    | -1.934872     | 1.296488      |
| H           | -14.803733    | -0.405527     | 1.351296      |
| H           | -10.337633    | 5.935789      | -1.378471     |
| H           | -12.732826    | 5.525466      | -0.909598     |
| C           | -9.648428     | 0.373315      | 0.250117      |
| C           | -7.45547      | 0.413899      | -0.094346     |
| C           | -6.045126     | 0.025303      | -0.174996     |
| C           | -5.093285     | 1.047921      | -0.095179     |
| C           | -5.588607     | -1.280791     | -0.375569     |
| C           | -3.744176     | 0.777757      | -0.206295     |
| H           | -5.436756     | 2.067144      | 0.044025      |
| C           | -4.234709     | -1.545478     | -0.486556     |
| H           | -6.287138     | -2.105746     | -0.458888     |
| C           | -3.282282     | -0.527459     | -0.405466     |

|   |           |           |           |
|---|-----------|-----------|-----------|
| H | -3.03393  | 1.598392  | -0.161945 |
| H | -3.911984 | -2.57324  | -0.624303 |
| N | -8.500168 | -0.400592 | 0.301273  |
| N | -7.873135 | 1.624999  | -0.392003 |
| C | -1.843139 | -0.818096 | -0.540475 |
| C | -1.400178 | -1.827931 | -1.404112 |
| C | -0.894806 | -0.085625 | 0.186827  |
| H | -2.117304 | -2.390537 | -1.996871 |
| C | 0.462385  | -0.337064 | 0.068154  |
| H | -1.233937 | 0.68148   | 0.876956  |
| C | 0.886681  | -1.339804 | -0.794637 |
| H | 1.177508  | 0.240133  | 0.647738  |
| C | -0.049267 | -2.082607 | -1.527385 |
| C | 0.653806  | -3.091311 | -2.391071 |
| H | 0.438871  | -2.940805 | -3.456877 |
| H | 0.347471  | -4.119156 | -2.157771 |
| C | 2.223159  | -1.81965  | -1.129529 |
| C | 2.100665  | -2.850837 | -2.072619 |
| C | 3.231617  | -3.477607 | -2.564876 |
| C | 4.479697  | -3.073088 | -2.114817 |
| H | 3.150078  | -4.282672 | -3.28962  |
| C | 3.469214  | -1.409703 | -0.682547 |
| C | 4.615547  | -2.038859 | -1.176873 |
| H | 3.555336  | -0.590207 | 0.02692   |
| C | -8.415926 | -1.760478 | 0.728964  |
| C | -8.811542 | -2.77337  | -0.134502 |
| C | -7.939393 | -2.046098 | 1.998863  |
| C | -8.727188 | -4.092335 | 0.284133  |
| H | -9.182658 | -2.517414 | -1.122837 |
| C | -7.852459 | -3.368999 | 2.408876  |
| H | -7.636947 | -1.232249 | 2.65092   |
| C | -8.245974 | -4.38992  | 1.553815  |
| H | -9.034443 | -4.890768 | -0.383198 |
| H | -7.477959 | -3.602423 | 3.400075  |
| H | -8.178501 | -5.423396 | 1.877683  |
| C | 8.782113  | -0.206132 | 1.502049  |
| H | 8.476822  | -0.369251 | 2.538271  |
| C | 9.990694  | 0.392365  | 1.38339   |
| C | 10.744669 | 0.930715  | 0.247952  |
| C | 10.873169 | 0.442092  | 2.593155  |
| C | 12.13916  | 0.977329  | 0.671879  |
| C | 10.230481 | 1.511779  | -0.878862 |
| C | 12.180476 | 0.755457  | 2.017832  |

|   |           |           |           |
|---|-----------|-----------|-----------|
| O | 13.39535  | 0.858332  | 2.552677  |
| C | 13.497766 | 1.249759  | 0.285922  |
| H | 5.367985  | -3.580639 | -2.478129 |
| C | 14.219795 | 1.152107  | 1.49304   |
| C | 15.585526 | 1.319598  | 1.593882  |
| C | 16.258537 | 1.589019  | 0.415022  |
| H | 16.09021  | 1.236453  | 2.549201  |
| C | 14.210554 | 1.509453  | -0.889879 |
| C | 15.578787 | 1.678109  | -0.806195 |
| H | 17.334075 | 1.728232  | 0.437627  |
| H | 13.705306 | 1.584128  | -1.844505 |
| H | 16.143243 | 1.883987  | -1.709418 |
| C | 8.837827  | 1.715313  | -1.082913 |
| N | 7.72124   | 1.942346  | -1.270102 |
| C | 11.058103 | 2.087564  | -1.879956 |
| N | 11.697387 | 2.56121   | -2.717089 |
| O | 10.568615 | 0.224883  | 3.740532  |
| C | 8.239367  | -1.248758 | -0.743982 |
| C | 5.950197  | -1.639555 | -0.741008 |
| C | 7.922331  | -0.736482 | 0.495197  |
| S | 6.217679  | -0.92255  | 0.812882  |
| C | 7.133686  | -1.757552 | -1.435253 |
| H | 7.190049  | -2.183093 | -2.430232 |
| H | 9.253878  | -1.278422 | -1.125584 |

**Table S3:** Cartesian coordinates of **PYFD2** compound.

| <b>Atom</b> | <b>X-axis</b> | <b>Y-axis</b> | <b>Z-axis</b> |
|-------------|---------------|---------------|---------------|
| C           | -14.446241    | -1.172886     | 1.430573      |
| C           | -13.095283    | -1.018317     | 1.149324      |
| C           | -12.608502    | 0.169914      | 0.598424      |
| C           | -13.520169    | 1.245138      | 0.352203      |
| C           | -14.898249    | 1.062562      | 0.64336       |
| C           | -15.340898    | -0.152341     | 1.175257      |
| C           | -13.080589    | 2.503958      | -0.16803      |
| C           | -11.711674    | 2.741003      | -0.458116     |
| C           | -10.806317    | 1.657657      | -0.224324     |
| C           | -11.30246     | 3.976756      | -0.94852      |
| H           | -10.24953     | 4.131864      | -1.161732     |
| C           | -12.229775    | 4.988054      | -1.161775     |
| C           | -13.570248    | 4.77752       | -0.889294     |
| C           | -14.016555    | 3.548396      | -0.392594     |
| C           | -15.397828    | 3.318891      | -0.099649     |
| C           | -15.816334    | 2.132796      | 0.39484       |

|   |            |           |           |
|---|------------|-----------|-----------|
| H | -16.866045 | 1.964931  | 0.621392  |
| H | -16.103159 | 4.125639  | -0.281012 |
| H | -14.796705 | -2.107872 | 1.856238  |
| H | -12.418717 | -1.835165 | 1.369554  |
| H | -16.398433 | -0.276138 | 1.392409  |
| H | -11.900515 | 5.948742  | -1.54548  |
| H | -14.296697 | 5.568508  | -1.056039 |
| C | -11.24083  | 0.436747  | 0.258175  |
| C | -9.048737  | 0.449883  | -0.096502 |
| C | -7.64037   | 0.051874  | -0.172261 |
| C | -6.687236  | 1.07714   | -0.191585 |
| C | -7.183986  | -1.265738 | -0.274995 |
| C | -5.339948  | 0.799293  | -0.30418  |
| H | -7.028856  | 2.104428  | -0.129847 |
| C | -5.831471  | -1.538264 | -0.386492 |
| H | -7.879316  | -2.096692 | -0.281194 |
| C | -4.87918   | -0.5175   | -0.404976 |
| H | -4.631169  | 1.621595  | -0.339868 |
| H | -5.509931  | -2.573927 | -0.445789 |
| N | -10.097762 | -0.342436 | 0.331847  |
| N | -9.46049   | 1.653124  | -0.433585 |
| C | -3.442463  | -0.818948 | -0.541618 |
| C | -3.01407   | -1.892029 | -1.3328   |
| C | -2.482746  | -0.034893 | 0.113646  |
| H | -3.741168  | -2.496409 | -1.86943  |
| C | -1.127772  | -0.297604 | -0.005288 |
| H | -2.811227  | 0.783479  | 0.747638  |
| C | -0.717937  | -1.364335 | -0.795114 |
| H | -0.40344   | 0.319937  | 0.518542  |
| C | -1.665315  | -2.158112 | -1.456342 |
| C | -0.976733  | -3.232526 | -2.24925  |
| H | -1.203812  | -3.163118 | -3.32082  |
| H | -1.283267  | -4.238425 | -1.934784 |
| C | 0.612405   | -1.874915 | -1.108458 |
| C | 0.474507   | -2.975876 | -1.967567 |
| C | 1.595609   | -3.647738 | -2.421705 |
| C | 2.851113   | -3.219537 | -2.017176 |
| H | 1.500438   | -4.506073 | -3.080405 |
| C | 1.865252   | -1.442477 | -0.706368 |
| C | 3.002257   | -2.118196 | -1.161432 |
| H | 1.96385    | -0.572652 | -0.061423 |
| C | -10.029008 | -1.690083 | 0.79909   |
| C | -10.41821  | -2.72313  | -0.042793 |

|   |            |           |           |
|---|------------|-----------|-----------|
| C | -9.578622  | -1.9431   | 2.085455  |
| C | -10.352587 | -4.030623 | 0.413583  |
| H | -10.769634 | -2.491144 | -1.044081 |
| C | -9.510818  | -3.254609 | 2.533566  |
| H | -9.281653  | -1.113289 | 2.719672  |
| C | -9.897221  | -4.295924 | 1.699871  |
| H | -10.654804 | -4.845152 | -0.236309 |
| H | -9.15703   | -3.46335  | 3.537801  |
| H | -9.8444    | -5.3203   | 2.05402   |
| C | 7.160279   | -0.115773 | 1.367631  |
| H | 6.756633   | -0.07733  | 2.382433  |
| C | 8.441917   | 0.338622  | 1.297282  |
| C | 9.361556   | 0.623246  | 0.199771  |
| C | 9.185017   | 0.478286  | 2.584355  |
| C | 10.705719  | 0.623936  | 0.78133   |
| C | 9.046235   | 1.056647  | -1.058675 |
| C | 10.579459  | 0.59444   | 2.135739  |
| O | 11.732151  | 0.674282  | 2.801175  |
| C | 12.119341  | 0.729883  | 0.54053   |
| H | 3.731576   | -3.760539 | -2.349425 |
| C | 12.684101  | 0.751343  | 1.831769  |
| C | 14.038439  | 0.815732  | 2.086864  |
| C | 14.860262  | 0.861494  | 0.9845    |
| H | 14.443319  | 0.799546  | 3.09105   |
| C | 12.984061  | 0.778047  | -0.556618 |
| C | 14.335512  | 0.850966  | -0.315618 |
| H | 12.625056  | 0.791298  | -1.578615 |
| C | 7.718866   | 1.367801  | -1.458893 |
| N | 6.656731   | 1.666414  | -1.79894  |
| C | 10.046712  | 1.356702  | -2.021069 |
| N | 10.843441  | 1.597302  | -2.821553 |
| O | 8.749866   | 0.455473  | 3.708081  |
| C | 6.634849   | -1.348082 | -0.793009 |
| C | 4.340503   | -1.701032 | -0.759737 |
| C | 6.32105    | -0.713897 | 0.395577  |
| S | 4.60863    | -0.845462 | 0.716488  |
| C | 5.528613   | -1.904304 | -1.435023 |
| H | 5.582928   | -2.423355 | -2.384418 |
| H | 7.649124   | -1.427684 | -1.168106 |
| N | 15.202483  | 1.055999  | -1.492133 |
| N | 16.309441  | 0.77798   | 1.234398  |
| O | 16.054542  | 1.910036  | -1.400413 |
| O | 16.73538   | 1.362959  | 2.203413  |

|   |           |          |           |
|---|-----------|----------|-----------|
| O | 16.95672  | 0.090678 | 0.477288  |
| O | 14.963603 | 0.392286 | -2.473944 |

**Table S4:** Cartesian coordinates of **PYFD3** compound.

| <b>Atom</b> | <b>Atom2</b> | <b>Y-axis</b> | <b>Z-axis</b> |
|-------------|--------------|---------------|---------------|
| C           | -15.530832   | -1.130152     | 1.428057      |
| C           | -14.180454   | -0.977484     | 1.143095      |
| C           | -13.691458   | 0.214705      | 0.602923      |
| C           | -14.599934   | 1.296137      | 0.372708      |
| C           | -15.977558   | 1.115387      | 0.667162      |
| C           | -16.422713   | -0.103675     | 1.187256      |
| C           | -14.157387   | 2.55933       | -0.134208     |
| C           | -12.788605   | 2.794717      | -0.42644      |
| C           | -11.886589   | 1.70506       | -0.209388     |
| C           | -12.376488   | 4.034935      | -0.90292      |
| H           | -11.323739   | 4.188805      | -1.11793      |
| C           | -13.300728   | 5.052257      | -1.100295     |
| C           | -14.641024   | 4.843373      | -0.825752     |
| C           | -15.090211   | 3.609953      | -0.342556     |
| C           | -16.471275   | 3.382165      | -0.047324     |
| C           | -16.892513   | 2.191882      | 0.434634      |
| H           | -17.942003   | 2.025378      | 0.663205      |
| H           | -17.174151   | 4.193718      | -0.21636      |
| H           | -15.883047   | -2.068379     | 1.845053      |
| H           | -13.506089   | -1.799063     | 1.35202       |
| H           | -17.479832   | -0.225925     | 1.40727       |
| H           | -12.96915    | 6.016422      | -1.473135     |
| H           | -15.365045   | 5.639085      | -0.980101     |
| C           | -12.324245   | 0.480094      | 0.259849      |
| C           | -10.133517   | 0.488942      | -0.102386     |
| C           | -8.727387    | 0.085115      | -0.186022     |
| C           | -7.767659    | 1.10426       | -0.18137      |
| C           | -8.279888    | -1.232944     | -0.317115     |
| C           | -6.421859    | 0.819866      | -0.29745      |
| H           | -8.102826    | 2.132167      | -0.09727      |
| C           | -6.92922     | -1.512037     | -0.431994     |
| H           | -8.981283    | -2.058484     | -0.342882     |
| C           | -5.9699      | -0.497608     | -0.425986     |
| H           | -5.707251    | 1.637788      | -0.312996     |
| H           | -6.614717    | -2.548351     | -0.513033     |
| N           | -11.184192   | -0.304626     | 0.319506      |
| N           | -10.541316   | 1.697837      | -0.423291     |
| C           | -4.535348    | -0.808422     | -0.564648     |



|   |            |           |           |
|---|------------|-----------|-----------|
| C | -4.115069  | -1.871827 | -1.373116 |
| C | -3.569792  | -0.046855 | 0.108171  |
| H | -4.846041  | -2.458633 | -1.923753 |
| C | -2.217298  | -0.323781 | -0.008323 |
| H | -3.891686  | 0.764016  | 0.755105  |
| C | -1.815728  | -1.382349 | -0.813337 |
| H | -1.488656  | 0.275822  | 0.530173  |
| C | -2.769124  | -2.152189 | -1.493846 |
| C | -2.090051  | -3.222765 | -2.299813 |
| H | -2.306309  | -3.13033  | -3.371936 |
| H | -2.414705  | -4.22939  | -2.006694 |
| C | -0.490363  | -1.907496 | -1.124401 |
| C | -0.637821  | -2.993155 | -2.001331 |
| C | 0.47633    | -3.676813 | -2.454652 |
| C | 1.734559   | -3.275396 | -2.03194  |
| H | 0.373414   | -4.523894 | -3.126634 |
| C | 0.765602   | -1.501124 | -0.704851 |
| C | 1.895683   | -2.18925  | -1.158651 |
| H | 0.872143   | -0.642782 | -0.045891 |
| C | -11.11752  | -1.656806 | 0.773916  |
| C | -11.515846 | -2.681312 | -0.074202 |
| C | -10.659013 | -1.922652 | 2.054738  |
| C | -11.45151  | -3.992888 | 0.370556  |
| H | -11.873259 | -2.43981  | -1.071135 |
| C | -10.59254  | -3.23819  | 2.491176  |
| H | -10.354853 | -1.099434 | 2.694129  |
| C | -10.98821  | -4.270964 | 1.651281  |
| H | -11.760861 | -4.800692 | -0.284382 |
| H | -10.232459 | -3.456704 | 3.491082  |
| H | -10.936437 | -5.298587 | 1.996008  |
| C | 6.071089   | -0.30484  | 1.435938  |
| H | 5.665769   | -0.279927 | 2.450447  |
| C | 7.360602   | 0.128674  | 1.375231  |
| C | 8.283116   | 0.418042  | 0.282035  |
| C | 8.108976   | 0.222872  | 2.665075  |
| C | 9.625026   | 0.39253   | 0.863927  |
| C | 7.977745   | 0.863509  | -0.976222 |
| C | 9.505154   | 0.328497  | 2.217392  |
| O | 10.662923  | 0.389853  | 2.878613  |
| C | 11.036021  | 0.514939  | 0.622191  |
| H | 2.608752   | -3.8269   | -2.363286 |
| C | 11.60926   | 0.495475  | 1.903497  |
| C | 12.965135  | 0.578381  | 2.139743  |

|   |           |           |           |
|---|-----------|-----------|-----------|
| C | 13.79226  | 0.691076  | 1.0376    |
| H | 13.35129  | 0.578915  | 3.150778  |
| C | 11.890996 | 0.602556  | -0.474626 |
| C | 13.252037 | 0.692449  | -0.26883  |
| H | 11.494012 | 0.58896   | -1.478888 |
| C | 6.658461  | 1.207567  | -1.375481 |
| N | 5.603941  | 1.533756  | -1.714068 |
| C | 8.984259  | 1.127774  | -1.943552 |
| N | 9.78969   | 1.32864   | -2.746771 |
| O | 7.673257  | 0.179303  | 3.787837  |
| C | 5.538407  | -1.496193 | -0.743746 |
| C | 3.237252  | -1.8024   | -0.738    |
| C | 5.225721  | -0.869614 | 0.44904   |
| S | 3.507706  | -0.96996  | 0.751402  |
| C | 4.427819  | -2.021773 | -1.403663 |
| H | 4.481841  | -2.530758 | -2.358481 |
| H | 6.554812  | -1.592994 | -1.108929 |
| S | 15.558286 | 0.784132  | 1.342542  |
| S | 14.273033 | 0.849811  | -1.743371 |
| O | 13.30226  | 0.239037  | -2.868354 |
| O | 14.474506 | 2.243221  | -2.048704 |
| O | 15.362027 | -0.080647 | -1.630719 |
| O | 16.114581 | -0.543538 | 1.421199  |
| O | 15.572891 | 1.406588  | 2.821994  |
| O | 16.099177 | 1.787946  | 0.468774  |
| H | 15.923976 | 0.758222  | 3.451422  |
| H | 12.86517  | 0.947272  | -3.367426 |

**Table S5:** Cartesian coordinates of **PYFD4** compound.

| <b>Atom</b> | <b>X-axis</b> | <b>Y-axis</b> | <b>Z-axis</b> |
|-------------|---------------|---------------|---------------|
| C           | -13.808272    | -1.200321     | 1.417543      |
| C           | -12.455735    | -1.043596     | 1.145172      |
| C           | -11.969421    | 0.139981      | 0.583807      |
| C           | -12.883525    | 1.208037      | 0.316538      |
| C           | -14.263128    | 1.023348      | 0.599063      |
| C           | -14.704966    | -0.186691     | 1.142658      |
| C           | -12.445142    | 2.461754      | -0.216925     |
| C           | -11.074976    | 2.700751      | -0.49948      |
| C           | -10.166904    | 1.624677      | -0.243761     |
| C           | -10.6672      | 3.93125       | -1.00413      |
| H           | -9.613305     | 4.087772      | -1.211514     |
| C           | -11.597089    | 4.935443      | -1.238741     |
| C           | -12.93873     | 4.722987      | -0.973501     |

|   |            |           |           |
|---|------------|-----------|-----------|
| C | -13.383695 | 3.498909  | -0.463223 |
| C | -14.76627  | 3.26738   | -0.178012 |
| C | -15.183661 | 2.086236  | 0.329105  |
| H | -16.234447 | 1.916822  | 0.549434  |
| H | -15.473577 | 4.068465  | -0.376014 |
| H | -14.15836  | -2.131498 | 1.851787  |
| H | -11.777619 | -1.85496  | 1.380565  |
| H | -15.763724 | -0.312277 | 1.352733  |
| H | -11.268963 | 5.892009  | -1.633545 |
| H | -13.667211 | 5.508379  | -1.156989 |
| C | -10.600124 | 0.408368  | 0.251341  |
| C | -8.405507  | 0.425607  | -0.087614 |
| C | -6.995079  | 0.032293  | -0.150168 |
| C | -6.04663   | 1.061469  | -0.187363 |
| C | -6.531844  | -1.284835 | -0.225267 |
| C | -4.697849  | 0.787917  | -0.29121  |
| H | -6.393201  | 2.088143  | -0.147479 |
| C | -5.177603  | -1.553018 | -0.327447 |
| H | -7.222674  | -2.119427 | -0.216957 |
| C | -4.230182  | -0.528277 | -0.364406 |
| H | -3.993307  | 1.612962  | -0.342651 |
| H | -4.851139  | -2.588158 | -0.365204 |
| N | -9.454555  | -0.365049 | 0.343828  |
| N | -8.819669  | 1.622774  | -0.4432   |
| C | -2.791473  | -0.823488 | -0.493405 |
| C | -2.355007  | -1.911682 | -1.259092 |
| C | -1.837528  | -0.015884 | 0.141653  |
| H | -3.077637  | -2.534987 | -1.779832 |
| C | -0.480489  | -0.268191 | 0.024855  |
| H | -2.172162  | 0.814085  | 0.757014  |
| C | -0.062621  | -1.348889 | -0.741419 |
| H | 0.239377   | 0.368555  | 0.531564  |
| C | -1.004097  | -2.168365 | -1.379355 |
| C | -0.307234  | -3.255581 | -2.147194 |
| H | -0.540882  | -3.218528 | -3.218897 |
| H | -0.600361  | -4.255803 | -1.803148 |
| C | 1.27194    | -1.851154 | -1.050079 |
| C | 1.142428   | -2.97486  | -1.880487 |
| C | 2.269073   | -3.64366  | -2.325434 |
| C | 3.521766   | -3.188699 | -1.941926 |
| H | 2.180555   | -4.519524 | -2.961578 |
| C | 2.521908   | -1.391994 | -0.669393 |
| C | 3.664778   | -2.06283  | -1.11719  |

|   |            |           |           |
|---|------------|-----------|-----------|
| H | 2.613304   | -0.504611 | -0.047746 |
| C | -9.385932  | -1.708135 | 0.823952  |
| C | -9.764285  | -2.749175 | -0.012935 |
| C | -8.947227  | -1.948961 | 2.116748  |
| C | -9.699203  | -4.052684 | 0.454676  |
| H | -10.106867 | -2.526198 | -1.019301 |
| C | -8.879911  | -3.256582 | 2.576162  |
| H | -8.658592  | -1.113032 | 2.746748  |
| C | -9.25532   | -4.305868 | 1.747431  |
| H | -9.992957  | -4.873488 | -0.19116  |
| H | -8.535126  | -3.456066 | 3.585404  |
| H | -9.202847  | -5.32707  | 2.110719  |
| C | 7.808204   | 0.096573  | 1.302705  |
| H | 7.3936     | 0.190153  | 2.309549  |
| C | 9.092232   | 0.543286  | 1.22636   |
| C | 10.034417  | 0.756991  | 0.131605  |
| C | 9.814776   | 0.750187  | 2.51651   |
| C | 11.368017  | 0.77416   | 0.736137  |
| C | 9.744027   | 1.122542  | -1.1545   |
| C | 11.217547  | 0.825226  | 2.08729   |
| O | 12.358991  | 0.93064   | 2.768381  |
| C | 12.787409  | 0.851053  | 0.514434  |
| H | 4.406656   | -3.726138 | -2.268057 |
| C | 13.33102   | 0.936935  | 1.813549  |
| C | 14.678192  | 1.009554  | 2.091182  |
| C | 15.536874  | 0.98434   | 1.002996  |
| H | 15.046039  | 1.078642  | 3.10716   |
| C | 13.6683    | 0.815209  | -0.567139 |
| C | 15.030126  | 0.883706  | -0.317679 |
| H | 13.313819  | 0.74341   | -1.58775  |
| C | 8.426588   | 1.427511  | -1.590514 |
| N | 7.373678   | 1.720353  | -1.962911 |
| C | 10.760337  | 1.3561    | -2.118858 |
| N | 11.568456  | 1.54155   | -2.922576 |
| O | 9.359974   | 0.796577  | 3.631898  |
| C | 7.289259   | -1.2304   | -0.805895 |
| C | 4.999982   | -1.613061 | -0.74132  |
| C | 6.974989   | -0.551724 | 0.357964  |
| S | 5.266168   | -0.692655 | 0.69536   |
| C | 6.186524   | -1.826918 | -1.416608 |
| H | 6.242473   | -2.38283  | -2.34469  |
| H | 8.301329   | -1.310481 | -1.186639 |
| C | 15.939685  | 0.849882  | -1.41683  |

|   |           |          |           |
|---|-----------|----------|-----------|
| N | 16.678316 | 0.821623 | -2.301998 |
| C | 16.943751 | 1.055991 | 1.222653  |
| N | 18.081724 | 1.114412 | 1.40042   |

**Table S6:** Cartesian coordinates of **PYFD5** compound.

| <b>Atom</b> | <b>X-axis</b> | <b>Y-axis</b> | <b>Z-axis</b> |
|-------------|---------------|---------------|---------------|
| C           | -15.081973    | -1.183057     | 1.446404      |
| C           | -13.731214    | -1.025914     | 1.165586      |
| C           | -13.24702     | 0.16201       | 0.611735      |
| C           | -14.161259    | 1.234214      | 0.361789      |
| C           | -15.539058    | 1.049046      | 0.652602      |
| C           | -15.97901     | -0.165447     | 1.187691      |
| C           | -13.724588    | 2.492542      | -0.162056     |
| C           | -12.35614     | 2.732079      | -0.45215      |
| C           | -11.448222    | 1.65174       | -0.214581     |
| C           | -11.949705    | 3.967209      | -0.946433     |
| H           | -10.897057    | 4.124179      | -1.159662     |
| C           | -12.879418    | 4.975483      | -1.163503     |
| C           | -14.219508    | 4.762507      | -0.89101      |
| C           | -14.663038    | 3.533892      | -0.390548     |
| C           | -16.043891    | 3.301817      | -0.097691     |
| C           | -16.459677    | 2.116209      | 0.400239      |
| H           | -17.509101    | 1.946357      | 0.626644      |
| H           | -16.751179    | 4.106169      | -0.282045     |
| H           | -15.430396    | -2.117729     | 1.874435      |
| H           | -13.052738    | -1.840466     | 1.388423      |
| H           | -17.036377    | -0.29129      | 1.404494      |
| H           | -12.552376    | 5.935705      | -1.550255     |
| H           | -14.947842    | 5.551117      | -1.060782     |
| C           | -11.879803    | 0.431232      | 0.271505      |
| C           | -9.687712     | 0.448527      | -0.083553     |
| C           | -8.278427     | 0.053855      | -0.160403     |
| C           | -7.32845      | 1.08186       | -0.189798     |
| C           | -7.818179     | -1.262948     | -0.256135     |
| C           | -5.980819     | 0.807501      | -0.306108     |
| H           | -7.67297      | 2.108468      | -0.133505     |
| C           | -6.465206     | -1.531965     | -0.371259     |
| H           | -8.510669     | -2.096253     | -0.254235     |
| C           | -5.516187     | -0.508424     | -0.400527     |
| H           | -5.274937     | 1.631857      | -0.350262     |
| H           | -6.14076      | -2.567019     | -0.425098     |
| N           | -10.734778    | -0.344931     | 0.347537      |
| N           | -10.102492    | 1.649813      | -0.424011     |

|   |            |           |           |
|---|------------|-----------|-----------|
| C | -4.079049  | -0.805633 | -0.542069 |
| C | -3.650447  | -1.882327 | -1.328202 |
| C | -3.119076  | -0.01349  | 0.103059  |
| H | -4.377904  | -2.493152 | -1.856989 |
| C | -1.763671  | -0.271509 | -0.021343 |
| H | -3.447492  | 0.807701  | 0.733422  |
| C | -1.353625  | -1.341789 | -0.80624  |
| H | -1.039065  | 0.352303  | 0.494629  |
| C | -2.301299  | -2.143953 | -1.456916 |
| C | -1.612595  | -3.221547 | -2.24537  |
| H | -1.845286  | -3.160854 | -3.316264 |
| H | -1.914079  | -4.226109 | -1.921864 |
| C | -0.022854  | -1.849493 | -1.122672 |
| C | -0.160946  | -2.957503 | -1.972453 |
| C | 0.960547   | -3.629247 | -2.42575  |
| C | 2.216288   | -3.194171 | -2.029275 |
| H | 0.865576   | -4.493223 | -3.077098 |
| C | 1.23039    | -1.409457 | -0.729819 |
| C | 2.367894   | -2.085114 | -1.183626 |
| H | 1.328551   | -0.534417 | -0.091865 |
| C | -10.663312 | -1.691536 | 0.817344  |
| C | -11.049669 | -2.726785 | -0.023109 |
| C | -10.213563 | -1.941392 | 2.104585  |
| C | -10.981761 | -4.033372 | 0.435491  |
| H | -11.400715 | -2.497137 | -1.025059 |
| C | -10.143475 | -3.252008 | 2.554935  |
| H | -9.918806  | -1.109885 | 2.737608  |
| C | -10.527011 | -4.29552  | 1.722649  |
| H | -11.281731 | -4.849639 | -0.213252 |
| H | -9.790133  | -3.458342 | 3.559826  |
| H | -10.472415 | -5.319169 | 2.07864   |
| C | 6.528046   | -0.057047 | 1.32501   |
| H | 6.112549   | 0.003742  | 2.334004  |
| C | 7.816163   | 0.375654  | 1.266365  |
| C | 8.764998   | 0.611176  | 0.180565  |
| C | 8.541972   | 0.52389   | 2.5646    |
| C | 10.09602   | 0.583134  | 0.786551  |
| C | 8.482161   | 1.021476  | -1.093739 |
| C | 9.944813   | 0.586166  | 2.139481  |
| O | 11.087778  | 0.64235   | 2.823519  |
| C | 11.517658  | 0.642968  | 0.570239  |
| H | 3.096896   | -3.73559  | -2.360443 |
| C | 12.059165  | 0.66561   | 1.864557  |

|   |           |           |           |
|---|-----------|-----------|-----------|
| C | 13.409909 | 0.695934  | 2.132576  |
| C | 14.277522 | 0.700367  | 1.055317  |
| H | 13.769414 | 0.712677  | 3.153035  |
| C | 12.40869  | 0.635599  | -0.503556 |
| C | 13.770636 | 0.661672  | -0.266573 |
| H | 12.044899 | 0.613746  | -1.521359 |
| C | 7.170527  | 1.361883  | -1.521146 |
| N | 6.12321   | 1.68359   | -1.885515 |
| C | 9.50327   | 1.265586  | -2.050751 |
| N | 10.313925 | 1.459738  | -2.849923 |
| O | 8.083683  | 0.538972  | 3.67975   |
| C | 6.00248   | -1.314099 | -0.824062 |
| C | 3.706698  | -1.661292 | -0.789549 |
| C | 5.689449  | -0.661862 | 0.353935  |
| S | 3.976044  | -0.782857 | 0.673441  |
| C | 4.894626  | -1.875732 | -1.460403 |
| H | 4.94956   | -2.408285 | -2.402265 |
| H | 7.016699  | -1.402138 | -1.197286 |
| C | 14.660073 | 0.708022  | -1.485032 |
| C | 15.750251 | 0.675092  | 1.38797   |
| F | 15.139167 | 1.937098  | -1.694682 |
| F | 15.702717 | -0.118525 | -1.387686 |
| F | 13.997105 | 0.361013  | -2.589494 |
| F | 16.463286 | 1.509902  | 0.634156  |
| F | 15.962696 | 1.026685  | 2.65809   |
| F | 16.263485 | -0.548349 | 1.237882  |

**Table S7:** Cartesian coordinates of **PYFD6** compound.

| <b>Atom</b> | <b>X-axis</b> | <b>Y-axis</b> | <b>Z-axis</b> |
|-------------|---------------|---------------|---------------|
| C           | -14.033854    | -1.167177     | 1.43015       |
| C           | -12.683001    | -1.014905     | 1.147166      |
| C           | -12.195582    | 0.170934      | 0.591599      |
| C           | -13.10652     | 1.245987      | 0.341987      |
| C           | -14.484517    | 1.065735      | 0.634996      |
| C           | -14.92779     | -0.146751     | 1.171885      |
| C           | -12.666291    | 2.502383      | -0.183555     |
| C           | -11.297383    | 2.737183      | -0.475556     |
| C           | -10.392705    | 1.654095      | -0.238003     |
| C           | -10.887556    | 3.970641      | -0.971242     |
| H           | -9.834655     | 4.124013      | -1.185856     |
| C           | -11.814215    | 4.981814      | -1.187918     |
| C           | -13.154653    | 4.773454      | -0.913584     |
| C           | -13.601559    | 3.54669       | -0.411591     |

|   |            |           |           |
|---|------------|-----------|-----------|
| C | -14.98278  | 3.319511  | -0.116576 |
| C | -15.401874 | 2.13578   | 0.383047  |
| H | -16.451537 | 1.969736  | 0.61117   |
| H | -15.687586 | 4.12612   | -0.300589 |
| H | -14.384804 | -2.100278 | 1.859545  |
| H | -12.00702  | -1.831634 | 1.369699  |
| H | -15.985245 | -0.268753 | 1.390442  |
| H | -11.484472 | 5.940674  | -1.575754 |
| H | -13.880602 | 5.564343  | -1.082963 |
| C | -10.827915 | 0.435449  | 0.249575  |
| C | -8.635964  | 0.4454    | -0.106401 |
| C | -7.227895  | 0.046061  | -0.180859 |
| C | -6.274151  | 1.070654  | -0.206351 |
| C | -6.772151  | -1.272335 | -0.276168 |
| C | -4.926999  | 0.791442  | -0.317128 |
| H | -6.615194  | 2.09848   | -0.150682 |
| C | -5.419725  | -1.546218 | -0.385725 |
| H | -7.467764  | -2.103033 | -0.277745 |
| C | -4.466791  | -0.526168 | -0.409783 |
| H | -4.217786  | 1.613146  | -0.357607 |
| H | -5.098707  | -2.582383 | -0.438872 |
| N | -9.685414  | -0.3443   | 0.32578   |
| N | -9.047016  | 1.647621  | -0.448072 |
| C | -3.030109  | -0.829248 | -0.542946 |
| C | -2.60113   | -1.907742 | -1.326475 |
| C | -2.070929  | -0.041745 | 0.10888   |
| H | -3.327831  | -2.515016 | -1.860408 |
| C | -0.715936  | -0.30647  | -0.00576  |
| H | -2.399893  | 0.780926  | 0.737046  |
| C | -0.305478  | -1.378771 | -0.787688 |
| H | 0.007967   | 0.313687  | 0.51557   |
| C | -1.252405  | -2.175935 | -1.445638 |
| C | -0.56322   | -3.256811 | -2.229295 |
| H | -0.787676  | -3.194288 | -3.301853 |
| H | -0.872644  | -4.259853 | -1.908541 |
| C | 1.025011   | -1.893418 | -1.093966 |
| C | 0.887773   | -3.000244 | -1.945147 |
| C | 2.009583   | -3.677367 | -2.389679 |
| C | 3.264388   | -3.248848 | -1.982706 |
| H | 1.915559   | -4.540638 | -3.042167 |
| C | 2.277415   | -1.459802 | -0.690895 |
| C | 3.414995   | -2.141085 | -1.13542  |
| H | 2.375119   | -0.585441 | -0.051929 |



|    |            |           |           |
|----|------------|-----------|-----------|
| C  | -9.618112  | -1.690627 | 0.796994  |
| C  | -10.008013 | -2.725536 | -0.04225  |
| C  | -9.168616  | -1.940562 | 2.084292  |
| C  | -9.943903  | -4.031867 | 0.417636  |
| H  | -10.358729 | -2.495827 | -1.044306 |
| C  | -9.102333  | -3.250932 | 2.535929  |
| H  | -8.871085  | -1.109324 | 2.716371  |
| C  | -9.489362  | -4.294113 | 1.704846  |
| H  | -10.246632 | -4.847865 | -0.230166 |
| H  | -8.749187  | -3.457338 | 3.540875  |
| H  | -9.437642  | -5.317567 | 2.061822  |
| C  | 7.565096   | -0.121273 | 1.404928  |
| H  | 7.17336    | -0.100552 | 2.424888  |
| C  | 8.82939    | 0.365508  | 1.31848   |
| C  | 9.731895   | 0.667093  | 0.207687  |
| C  | 9.589721   | 0.531877  | 2.596128  |
| C  | 11.07994   | 0.688996  | 0.77086   |
| C  | 9.387294   | 1.094207  | -1.045788 |
| C  | 10.970432  | 0.669265  | 2.129056  |
| O  | 12.129701  | 0.780102  | 2.777371  |
| C  | 12.488349  | 0.824407  | 0.506433  |
| H  | 4.145244   | -3.794359 | -2.306638 |
| C  | 13.070887  | 0.86569   | 1.787932  |
| C  | 14.424382  | 0.970207  | 2.018884  |
| C  | 15.24197   | 1.0247    | 0.904913  |
| H  | 14.830889  | 1.002549  | 3.021951  |
| C  | 13.336796  | 0.868606  | -0.600652 |
| C  | 14.698101  | 0.970369  | -0.391682 |
| H  | 12.956409  | 0.83415   | -1.613923 |
| C  | 8.047518   | 1.377703  | -1.425962 |
| N  | 6.976049   | 1.656305  | -1.753939 |
| C  | 10.362969  | 1.418322  | -2.02609  |
| N  | 11.132144  | 1.679646  | -2.84696  |
| O  | 9.162488   | 0.509701  | 3.724137  |
| C  | 7.048758   | -1.373824 | -0.747113 |
| C  | 4.752989   | -1.722985 | -0.730848 |
| C  | 6.727989   | -0.733948 | 0.433478  |
| S  | 5.014712   | -0.859221 | 0.744081  |
| C  | 5.943603   | -1.931022 | -1.395848 |
| H  | 6.003578   | -2.454702 | -2.342538 |
| H  | 8.065702   | -1.454746 | -1.115065 |
| C1 | 15.738066  | 1.026635  | -1.781502 |
| C1 | 16.952207  | 1.15368   | 1.145641  |

---

**Table S8:** Cartesian coordinates of **PYFD7** compound.

| <b>Atom</b> | <b>X-axis</b> | <b>Y-axis</b> | <b>Z-axis</b> |
|-------------|---------------|---------------|---------------|
| C           | -13.419585    | -1.238654     | 1.364408      |
| C           | -12.069247    | -1.071091     | 1.087707      |
| C           | -11.585799    | 0.136145      | 0.577454      |
| C           | -12.499542    | 1.218386      | 0.373076      |
| C           | -13.877083    | 1.022382      | 0.657748      |
| C           | -14.316917    | -0.211965     | 1.145239      |
| C           | -12.061932    | 2.497354      | -0.097057     |
| C           | -10.693112    | 2.748159      | -0.375705     |
| C           | -9.786086     | 1.657874      | -0.18487      |
| C           | -10.285651    | 4.003093      | -0.816242     |
| H           | -9.23275      | 4.168519      | -1.021825     |
| C           | -11.214776    | 5.020108      | -0.990685     |
| C           | -12.55519     | 4.79656       | -0.728406     |
| C           | -12.999769    | 3.548054      | -0.281043     |
| C           | -14.380792    | 3.304656      | 0.00161       |
| C           | -14.797234    | 2.099617      | 0.449906      |
| H           | -15.846684    | 1.921235      | 0.66953       |
| H           | -15.087587    | 4.11649       | -0.148765     |
| H           | -13.767504    | -2.188598     | 1.757822      |
| H           | -11.390172    | -1.892722     | 1.280127      |
| H           | -15.374052    | -0.345932     | 1.358235      |
| H           | -10.886932    | 5.995887      | -1.335611     |
| H           | -13.282877    | 5.592221      | -0.864779     |
| C           | -10.219183    | 0.416973      | 0.244868      |
| C           | -8.02739      | 0.449043      | -0.106758     |
| C           | -6.61983      | 0.052234      | -0.19491      |
| C           | -5.660343     | 1.065975      | -0.097446     |
| C           | -6.17353      | -1.253786     | -0.417601     |
| C           | -4.313071     | 0.787047      | -0.210879     |
| H           | -5.996322     | 2.085335      | 0.058577      |
| C           | -4.821657     | -1.527248     | -0.53064      |
| H           | -6.878715     | -2.071425     | -0.516045     |
| C           | -3.861227     | -0.518524     | -0.430057     |
| H           | -3.596328     | 1.601057      | -0.151235     |
| H           | -4.507012     | -2.555147     | -0.684805     |
| N           | -9.075081     | -0.363485     | 0.284906      |
| N           | -8.439245     | 1.665205      | -0.391421     |
| C           | -2.424188     | -0.820684     | -0.562593     |
| C           | -1.987032     | -1.825295     | -1.435255     |
| C           | -1.472199     | -0.107477     | 0.178953      |

|   |           |           |           |
|---|-----------|-----------|-----------|
| H | -2.706463 | -2.372915 | -2.039102 |
| C | -0.117263 | -0.3737   | 0.066545  |
| H | -1.806823 | 0.655398  | 0.875965  |
| C | 0.301079  | -1.372347 | -0.803919 |
| H | 0.600499  | 0.188283  | 0.657705  |
| C | -0.638536 | -2.095226 | -1.551643 |
| C | 0.057983  | -3.104712 | -2.419644 |
| H | -0.144823 | -2.940013 | -3.485729 |
| H | -0.264903 | -4.130486 | -2.200065 |
| C | 1.633687  | -1.86724  | -1.132292 |
| C | 1.505067  | -2.888173 | -2.085792 |
| C | 2.631171  | -3.527365 | -2.573054 |
| C | 3.880746  | -3.1449   | -2.108394 |
| H | 2.544568  | -4.324932 | -3.305433 |
| C | 2.881379  | -1.479087 | -0.6709   |
| C | 4.023025  | -2.120741 | -1.16034  |
| H | 2.972619  | -0.667177 | 0.046602  |
| C | -8.996844 | -1.729354 | 0.694364  |
| C | -9.405635 | -2.727942 | -0.179632 |
| C | -8.51121  | -2.03537  | 1.955977  |
| C | -9.325398 | -4.053058 | 0.220005  |
| H | -9.783384 | -2.456337 | -1.161276 |
| C | -8.428309 | -3.364397 | 2.346829  |
| H | -8.197991 | -1.232533 | 2.616553  |
| C | -8.834929 | -4.371083 | 1.481145  |
| H | -9.642939 | -4.840301 | -0.455771 |
| H | -8.046434 | -3.613692 | 3.331324  |
| H | -8.770571 | -5.409342 | 1.789958  |
| C | 8.1906    | -0.354954 | 1.559588  |
| H | 7.871004  | -0.507502 | 2.593063  |
| C | 9.413255  | 0.219089  | 1.451736  |
| C | 10.184903 | 0.742808  | 0.322846  |
| C | 10.284929 | 0.250972  | 2.669167  |
| C | 11.576377 | 0.772931  | 0.761483  |
| C | 9.693989  | 1.324026  | -0.81389  |
| C | 11.60257  | 0.546577  | 2.106161  |
| O | 12.816441 | 0.632054  | 2.651643  |
| C | 12.939693 | 1.033204  | 0.390883  |
| H | 4.764455  | -3.662644 | -2.468265 |
| C | 13.648275 | 0.919337  | 1.603324  |
| C | 15.016192 | 1.07106   | 1.718498  |
| C | 15.688011 | 1.337707  | 0.548872  |
| H | 15.540572 | 0.98239   | 2.661731  |

|   |           |           |           |
|---|-----------|-----------|-----------|
| C | 13.659122 | 1.291875  | -0.780672 |
| C | 15.017718 | 1.443157  | -0.677325 |
| H | 13.189388 | 1.390388  | -1.751158 |
| C | 8.308014  | 1.550231  | -1.037475 |
| N | 7.19812   | 1.795385  | -1.240272 |
| C | 10.546464 | 1.871369  | -1.809869 |
| N | 11.212598 | 2.317888  | -2.640948 |
| O | 9.96819   | 0.035499  | 3.813238  |
| C | 7.653902  | -1.390044 | -0.690151 |
| C | 5.359163  | -1.744576 | -0.709393 |
| C | 7.332347  | -0.871323 | 0.545926  |
| S | 5.621795  | -1.031533 | 0.846765  |
| C | 6.548166  | -1.88211  | -1.391699 |
| H | 6.608505  | -2.309176 | -2.385727 |
| H | 8.671633  | -1.435977 | -1.061469 |
| F | 15.747172 | 1.696246  | -1.760969 |
| F | 17.004327 | 1.499905  | 0.558545  |

**Table S9:** Calculated energies ( $E$ ) and energy gap ( $\Delta E$ ) of HOMO-1, LUMO+1, HOMO-2 and LUMO+2 for **PYFR** and **PYFD1-PYFD7**.

| Compounds    | HOMO-1 | LUMO+1 | $\Delta E$ | HOMO-2 | LUMO+2 | $\Delta E$ |
|--------------|--------|--------|------------|--------|--------|------------|
| <b>PYFR</b>  | -6.290 | -1.574 | 4.716      | -6.742 | -1.016 | 5.726      |
| <b>PYFD1</b> | -6.270 | -2.849 | 3.421      | -6.564 | -1.788 | 4.776      |
| <b>PYFD2</b> | -6.350 | -3.366 | 2.984      | -6.656 | -2.873 | 3.783      |
| <b>PYFD3</b> | -6.352 | -3.232 | 3.120      | -6.658 | -1.953 | 4.705      |
| <b>PYFD4</b> | -6.346 | -3.254 | 3.092      | -6.648 | -2.233 | 4.415      |
| <b>PYFD5</b> | -6.329 | -3.101 | 3.228      | -6.625 | -1.812 | 4.813      |
| <b>PYFD6</b> | -6.303 | -2.991 | 3.312      | -6.594 | -1.803 | 4.791      |
| <b>PYFD7</b> | -6.287 | -2.920 | 3.367      | -6.584 | -1.794 | 4.790      |

**Table S10:** Percentage contributions of donor, acceptor and  $\pi$ -spacer for HOMOs and LUMOs of **PYFR** and **PYFD1-PYFD7**.

| Compounds    | HOMOs |          |               | LUMOs |          |               |
|--------------|-------|----------|---------------|-------|----------|---------------|
|              | Donor | Acceptor | $\pi$ -spacer | Donor | Acceptor | $\pi$ -spacer |
| <b>PYFR</b>  | 83.4  | -        | 16.6          | 61.3  | -        | 38.7          |
| <b>PYFD1</b> | 83.1  | 0.1      | 16.9          | 0.0   | 92.1     | 7.9           |
| <b>PYFD2</b> | 83.7  | 0.1      | 16.2          | 0.0   | 80.8     | 19.2          |
| <b>PYFD3</b> | 83.8  | 0.1      | 16.1          | 0.0   | 91.1     | 8.9           |
| <b>PYFD4</b> | 83.6  | 0.1      | 16.3          | 0.0   | 91.6     | 8.4           |
| <b>PYFD5</b> | 83.5  | 0.1      | 16.5          | 0.0   | 90.7     | 9.3           |
| <b>PYFD6</b> | 83.2  | 0.1      | 16.8          | 0.0   | 91.6     | 8.4           |
| <b>PYFD7</b> | 83.3  | 0.1      | 16.6          | 0.0   | 92.3     | 7.7           |

**Table S11:** Natural bond orbitals (NBOs) analysis of **PYFR**.

| Donor( $i$ ) | Type | Acceptor( $j$ ) | Typ<br>e | $E(2)$     | $E(j)-E(i)$ | $F(i,j)$ |
|--------------|------|-----------------|----------|------------|-------------|----------|
|              |      |                 |          | [kcal/mol] | [a.u.]      | [a.u.]   |

|         |          |         |            |       |      |       |
|---------|----------|---------|------------|-------|------|-------|
| C9-N37  | $\sigma$ | C25-C26 | $\sigma^*$ | 6.74  | 1.28 | 0.083 |
| C9-C24  | $\sigma$ | N36-C60 | $\sigma^*$ | 6.07  | 1.09 | 0.073 |
| C25-N37 | $\sigma$ | C8-C9   | $\sigma^*$ | 5.78  | 1.4  | 0.08  |
| C3-C24  | $\sigma$ | C9-C24  | $\sigma^*$ | 5.69  | 1.28 | 0.076 |
| C42-C44 | $\sigma$ | C44-C46 | $\sigma^*$ | 5.41  | 1.29 | 0.075 |
| C62-C65 | $\sigma$ | C60-C62 | $\sigma^*$ | 4.12  | 1.3  | 0.065 |
| C12-C13 | $\sigma$ | C14-C15 | $\sigma^*$ | 3.55  | 1.26 | 0.06  |
| C9-C24  | $\sigma$ | C2-C3   | $\sigma^*$ | 3.1   | 1.28 | 0.056 |
| C38-C39 | $\sigma$ | C29-C33 | $\sigma^*$ | 2.18  | 1.27 | 0.047 |
| C28-H32 | $\sigma$ | C28-C31 | $\sigma^*$ | 1.11  | 1.12 | 0.032 |
| C25-N37 | $\sigma$ | C25-N36 | $\sigma^*$ | 1.05  | 1.27 | 0.033 |
| C2-H20  | $\sigma$ | C1-C2   | $\sigma^*$ | 1     | 1.11 | 0.03  |
| C28-H32 | $\sigma$ | C26-C28 | $\sigma^*$ | 0.89  | 1.1  | 0.028 |
| C56-H59 | $\sigma$ | C53-C56 | $\sigma^*$ | 0.7   | 1.1  | 0.025 |
| C56-H59 | $\sigma$ | C55-C56 | $\sigma^*$ | 0.68  | 1.11 | 0.025 |
| C25-N36 | $\sigma$ | C60-C61 | $\sigma^*$ | 0.63  | 1.39 | 0.026 |
| C24-N36 | $\sigma$ | C9-N37  | $\sigma^*$ | 0.53  | 1.29 | 0.023 |
| C47-H48 | $\sigma$ | C47-C51 | $\sigma^*$ | 0.51  | 0.95 | 0.02  |
| C47-H49 | $\sigma$ | C47-C51 | $\sigma^*$ | 0.51  | 0.94 | 0.02  |
| C24-N36 | $\sigma$ | C25-N37 | $\sigma^*$ | 0.5   | 1.35 | 0.023 |
| C65-C67 | $\pi$    | C60-C62 | $\pi^*$    | 23.98 | 0.29 | 0.075 |
| C65-C67 | $\pi$    | C60-C62 | $\pi^*$    | 23.98 | 0.29 | 0.075 |
| C61-C63 | $\pi$    | C60-C62 | $\pi^*$    | 23.3  | 0.29 | 0.074 |
| C42-C44 | $\pi$    | C38-C40 | $\pi^*$    | 23.28 | 0.29 | 0.074 |
| C50-C51 | $\pi$    | C42-C44 | $\pi^*$    | 20.78 | 0.29 | 0.07  |
| C8-C10  | $\pi$    | C9-C24  | $\pi^*$    | 19.76 | 0.29 | 0.068 |
| C8-C10  | $\pi$    | C7-C14  | $\pi^*$    | 19.3  | 0.3  | 0.069 |
| C2-C3   | $\pi$    | C9-C24  | $\pi^*$    | 18.81 | 0.3  | 0.068 |
| C9-C24  | $\pi$    | C8-C10  | $\pi^*$    | 18.15 | 0.32 | 0.069 |
| C9-C24  | $\pi$    | C25-N37 | $\pi^*$    | 16.11 | 0.29 | 0.062 |
| C15-C16 | $\pi$    | C7-C14  | $\pi^*$    | 14.65 | 0.31 | 0.065 |
| C4-C5   | $\pi$    | C15-C16 | $\pi^*$    | 14.22 | 0.3  | 0.063 |
| C42-C44 | $\pi$    | C50-C51 | $\pi^*$    | 13.85 | 0.3  | 0.058 |
| C60-C62 | $\pi$    | C28-C31 | $\pi^*$    | 0.60  | 0.32 | 0.012 |
| N36     | LP(1)    | C25-N37 | $\pi^*$    | 51.64 | 0.3  | 0.111 |
| N36     | LP(1)    | C9-C24  | $\pi^*$    | 34.74 | 0.32 | 0.095 |
| N36     | LP(1)    | C60-C62 | $\pi^*$    | 1.64  | 0.3  | 0.02  |
| N37     | LP(1)    | C25-N36 | $\sigma^*$ | 10.08 | 0.81 | 0.081 |
| N37     | LP(1)    | C9-C24  | $\sigma^*$ | 6.93  | 0.96 | 0.074 |
| N37     | LP(1)    | N36-C60 | $\sigma^*$ | 0.67  | 0.77 | 0.02  |

**Table S12:** Natural bond orbitals (NBOs) analysis of **PYFD1**.

| Donor( <i>i</i> ) | Type     | Acceptor( <i>j</i> ) | Typ<br>e   | <i>E</i> (2)        | <i>E</i> ( <i>j</i> )- <i>E</i> ( <i>i</i> ) | <i>F</i> ( <i>i</i> , <i>j</i> ) |
|-------------------|----------|----------------------|------------|---------------------|----------------------------------------------|----------------------------------|
|                   |          |                      |            | [ <i>kcal/mol</i> ] | [ <i>a.u</i> ]                               | [ <i>a.u</i> ]                   |
| C69-H70           | $\sigma$ | C71-C72              | $\sigma^*$ | 9.4                 | 1                                            | 0.086                            |
| C75-C91           | $\sigma$ | C91-N92              | $\sigma^*$ | 8.5                 | 1.61                                         | 0.105                            |
| C91-N92           | $\sigma$ | C75-C91              | $\sigma^*$ | 8.34                | 1.57                                         | 0.103                            |
| C75-C89           | $\sigma$ | C89-N90              | $\sigma^*$ | 8.21                | 1.62                                         | 0.103                            |
| C89-N90           | $\sigma$ | C75-C89              | $\sigma^*$ | 8.11                | 1.57                                         | 0.101                            |

|         |          |         |            |       |      |       |
|---------|----------|---------|------------|-------|------|-------|
| C71-C73 | $\sigma$ | C76-O77 | $\sigma^*$ | 7.08  | 1.02 | 0.076 |
| C9-N37  | $\sigma$ | C25-C26 | $\sigma^*$ | 6.59  | 1.28 | 0.082 |
| C69-C71 | $\sigma$ | C71-C72 | $\sigma^*$ | 5.95  | 1.23 | 0.077 |
| C5-C6   | $\sigma$ | C4-C5   | $\sigma^*$ | 4.77  | 1.27 | 0.07  |
| C44-C50 | $\sigma$ | C42-C44 | $\sigma^*$ | 4.37  | 1.25 | 0.066 |
| C94-C98 | $\sigma$ | C95-C98 | $\sigma^*$ | 3.84  | 1.28 | 0.063 |
| C74-C78 | $\sigma$ | C73-C76 | $\sigma^*$ | 3.67  | 1.14 | 0.058 |
| C78-C84 | $\sigma$ | O77-C80 | $\sigma^*$ | 2.56  | 1.04 | 0.046 |
| C58-C60 | $\sigma$ | C60-H64 | $\sigma^*$ | 1.38  | 1.14 | 0.036 |
| C82-H86 | $\sigma$ | C81-H83 | $\sigma^*$ | 0.74  | 0.93 | 0.023 |
| C71-C72 | $\sigma$ | C76-O77 | $\sigma^*$ | 0.61  | 1.06 | 0.023 |
| O77-C80 | $\sigma$ | C76-O77 | $\sigma^*$ | 0.53  | 1.3  | 0.024 |
| C78-C84 | $\sigma$ | C74-C76 | $\sigma^*$ | 0.51  | 1.27 | 0.023 |
| C78-C84 | $\sigma$ | C74-C76 | $\sigma^*$ | 0.51  | 1.27 | 0.023 |
| C47-H49 | $\sigma$ | C47-C51 | $\sigma^*$ | 0.5   | 0.95 | 0.02  |
| C81-C82 | $\pi$    | C78-C80 | $\pi^*$    | 25.5  | 0.28 | 0.078 |
| C38-C39 | $\pi$    | C44-C46 | $\pi^*$    | 24.63 | 0.3  | 0.078 |
| C63-C65 | $\pi$    | C58-C60 | $\pi^*$    | 24.09 | 0.29 | 0.075 |
| C25-N37 | $\pi$    | C9-C24  | $\pi^*$    | 23.87 | 0.36 | 0.088 |
| C7-C14  | $\pi$    | C3-C4   | $\pi^*$    | 22.89 | 0.28 | 0.072 |
| C59-C61 | $\pi$    | C63-C65 | $\pi^*$    | 21.54 | 0.3  | 0.072 |
| C1-C2   | $\pi$    | C5-C6   | $\pi^*$    | 20.9  | 0.3  | 0.072 |
| C8-C10  | $\pi$    | C7-C14  | $\pi^*$    | 19.38 | 0.29 | 0.069 |
| C74-C76 | $\pi$    | C78-C80 | $\pi^*$    | 14.4  | 0.32 | 0.063 |
| C72-C75 | $\pi$    | C69-C71 | $\pi^*$    | 8.02  | 0.35 | 0.047 |
| C73-O93 | $\pi$    | C74-C76 | $\pi^*$    | 4.64  | 0.43 | 0.043 |
| C74-C76 | $\pi$    | C74-C76 | $\pi^*$    | 0.67  | 0.32 | 0.013 |
| C91-N92 | $\pi$    | C89-N90 | $\pi^*$    | 0.65  | 0.48 | 0.016 |
| C89-N90 | $\pi$    | C91-N92 | $\pi^*$    | 0.64  | 0.47 | 0.016 |
| N36     | LP(1)    | C25-N37 | $\pi^*$    | 51.69 | 0.3  | 0.111 |
| O77     | LP(2)    | C78-C80 | $\pi^*$    | 25.53 | 0.38 | 0.092 |
| N36     | LP(1)    | C58-C60 | $\pi^*$    | 1.47  | 0.3  | 0.019 |
| N90     | LP(1)    | C75-C89 | $\sigma^*$ | 12.69 | 1.04 | 0.103 |
| N37     | LP(1)    | C25-N36 | $\sigma^*$ | 9.91  | 0.81 | 0.08  |
| N37     | LP(1)    | N36-C58 | $\sigma^*$ | 0.68  | 0.77 | 0.021 |

**Table S13:** Natural bond orbitals (NBOs) analysis of PYFD2.

| Donor( <i>i</i> ) | Type     | Acceptor( <i>j</i> ) | Typ<br>e   | <i>E</i> (2) | <i>E</i> ( <i>j</i> )- <i>E</i> ( <i>i</i> ) | <i>F</i> ( <i>i,j</i> ) |
|-------------------|----------|----------------------|------------|--------------|----------------------------------------------|-------------------------|
|                   |          |                      |            | [kcal/mol]   | [a.u]                                        | [a.u]                   |
| C69-H70           | $\sigma$ | C71-C72              | $\sigma^*$ | 9.39         | 1                                            | 0.087                   |
| C75-C89           | $\sigma$ | C89-N90              | $\sigma^*$ | 8.59         | 1.62                                         | 0.106                   |
| C89-N90           | $\sigma$ | C75-C89              | $\sigma^*$ | 8.4          | 1.57                                         | 0.103                   |
| C78-C80           | $\sigma$ | C72-C74              | $\sigma^*$ | 7.86         | 1.18                                         | 0.086                   |
| C71-C73           | $\sigma$ | C76-O77              | $\sigma^*$ | 6.99         | 1.01                                         | 0.075                   |
| C69-C71           | $\sigma$ | C71-C72              | $\sigma^*$ | 6.14         | 1.24                                         | 0.078                   |
| C72-C75           | $\sigma$ | C75-C87              | $\sigma^*$ | 5.95         | 1.28                                         | 0.078                   |
| O77-C80           | $\sigma$ | C73-C76              | $\sigma^*$ | 5.38         | 1.39                                         | 0.078                   |
| C50-C55           | $\sigma$ | C44-C50              | $\sigma^*$ | 4.93         | 1.24                                         | 0.07                    |
| C29-H34           | $\sigma$ | C26-C27              | $\sigma^*$ | 4.4          | 1.09                                         | 0.062                   |

|           |          |           |            |       |      |       |
|-----------|----------|-----------|------------|-------|------|-------|
| C29-C33   | $\sigma$ | C27-C29   | $\sigma^*$ | 3.98  | 1.31 | 0.065 |
| C60-H64   | $\sigma$ | C63-C65   | $\sigma^*$ | 3.64  | 1.11 | 0.057 |
| C24-N36   | $\sigma$ | N36-C58   | $\sigma^*$ | 2.82  | 1.19 | 0.052 |
| C25-C26   | $\sigma$ | C25-N36   | $\sigma^*$ | 1.76  | 1.11 | 0.04  |
| C94-S95   | $\sigma$ | C92-C94   | $\sigma^*$ | 0.66  | 1.24 | 0.026 |
| C84-C85   | $\sigma$ | C85-N99   | $\sigma^*$ | 0.63  | 1.02 | 0.023 |
| N99-O101  | $\sigma$ | N99-O104  | $\sigma^*$ | 0.56  | 1.56 | 0.027 |
| C47-H49   | $\sigma$ | C46-C47   | $\sigma^*$ | 0.51  | 0.94 | 0.02  |
| C47-H49   | $\sigma$ | C47-C51   | $\sigma^*$ | 0.5   | 0.95 | 0.02  |
| C81-C82   | $\sigma$ | C82-N100  | $\sigma^*$ | 0.5   | 1.02 | 0.021 |
| C38-C39   | $\pi$    | C44-C46   | $\pi^*$    | 24.73 | 0.3  | 0.078 |
| C31-C33   | $\pi$    | C26-C28   | $\pi^*$    | 24.48 | 0.29 | 0.076 |
| C63-C65   | $\pi$    | C58-C60   | $\pi^*$    | 24.12 | 0.29 | 0.075 |
| C55-C56   | $\pi$    | C52-C53   | $\pi^*$    | 20.16 | 0.3  | 0.07  |
| C74-C76   | $\pi$    | C78-C80   | $\pi^*$    | 16.04 | 0.3  | 0.065 |
| C72-C75   | $\pi$    | C74-C76   | $\pi^*$    | 9.36  | 0.32 | 0.05  |
| N100-O102 | $\pi$    | N100-O102 | $\pi^*$    | 7.01  | 0.36 | 0.053 |
| N99-O101  | $\pi$    | N99-O101  | $\pi^*$    | 6.59  | 0.4  | 0.054 |
| C73-O91   | $\pi$    | C74-C76   | $\pi^*$    | 4.79  | 0.42 | 0.043 |
| C72-C75   | $\pi$    | C72-C75   | $\pi^*$    | 1.51  | 0.33 | 0.02  |
| C74-C76   | $\pi$    | C74-C76   | $\pi^*$    | 0.89  | 0.32 | 0.015 |
| C87-N88   | $\pi$    | C89-N90   | $\pi^*$    | 0.61  | 0.47 | 0.015 |
| C89-N90   | $\pi$    | C87-N88   | $\pi^*$    | 0.6   | 0.48 | 0.015 |
| N36       | LP(1)    | C25-N37   | $\pi^*$    | 51.77 | 0.3  | 0.111 |
| O103      | LP(2)    | C81-C82   | $\pi^*$    | 0.64  | 0.32 | 0.014 |
| O91       | LP(2)    | C73-C76   | $\sigma^*$ | 24.22 | 0.73 | 0.12  |
| O102      | LP(2)    | N100-O103 | $\sigma^*$ | 20.72 | 0.75 | 0.112 |
| O102      | LP(2)    | C82-C85   | $\sigma^*$ | 0.56  | 0.84 | 0.02  |

**Table S14:** Natural bond orbitals (NBOs) analysis of **PYFD3**.

| Donor( <i>i</i> ) | Type     | Acceptor( <i>j</i> ) | Typ        |  | <i>E</i> (2)<br>[kcal/mol] | <i>E</i> ( <i>j</i> )- <i>E</i> ( <i>i</i> )<br>[a.u.] | <i>F</i> ( <i>i,j</i> )<br>[a.u.] |
|-------------------|----------|----------------------|------------|--|----------------------------|--------------------------------------------------------|-----------------------------------|
|                   |          |                      | e          |  |                            |                                                        |                                   |
| C69-H70           | $\sigma$ | C71-C72              | $\sigma^*$ |  | 9.33                       | 1                                                      | 0.086                             |
| C75-C89           | $\sigma$ | C89-N90              | $\sigma^*$ |  | 8.63                       | 1.61                                                   | 0.106                             |
| C89-N90           | $\sigma$ | C75-C89              | $\sigma^*$ |  | 8.35                       | 1.57                                                   | 0.103                             |
| C78-C80           | $\sigma$ | C72-C74              | $\sigma^*$ |  | 7.81                       | 1.19                                                   | 0.086                             |
| C74-C76           | $\sigma$ | C78-C84              | $\sigma^*$ |  | 7.03                       | 1.3                                                    | 0.085                             |
| C9-N37            | $\sigma$ | C25-C26              | $\sigma^*$ |  | 6.56                       | 1.28                                                   | 0.082                             |
| C81-C82           | $\sigma$ | C82-C85              | $\sigma^*$ |  | 6.19                       | 1.28                                                   | 0.079                             |
| C71-C72           | $\sigma$ | C74-C78              | $\sigma^*$ |  | 6.07                       | 1.19                                                   | 0.076                             |
| C74-C78           | $\sigma$ | C78-C84              | $\sigma^*$ |  | 5.74                       | 1.27                                                   | 0.076                             |
| C42-C44           | $\sigma$ | C44-C46              | $\sigma^*$ |  | 5.5                        | 1.29                                                   | 0.075                             |
| C55-C56           | $\sigma$ | C56-C93              | $\sigma^*$ |  | 4.08                       | 1.21                                                   | 0.063                             |
| C44-C46           | $\sigma$ | C44-C50              | $\sigma^*$ |  | 3.18                       | 1.2                                                    | 0.055                             |
| C29-C33           | $\sigma$ | C38-C39              | $\sigma^*$ |  | 2.06                       | 1.28                                                   | 0.046                             |
| S99-O105          | $\sigma$ | C82-S99              | $\sigma^*$ |  | 1.01                       | 0.92                                                   | 0.028                             |
| C28-H32           | $\sigma$ | C31-H35              | $\sigma^*$ |  | 0.82                       | 0.94                                                   | 0.025                             |
| C65-H68           | $\sigma$ | C61-C65              | $\sigma^*$ |  | 0.71                       | 1.11                                                   | 0.025                             |
| C25-N36           | $\sigma$ | C58-C59              | $\sigma^*$ |  | 0.63                       | 1.39                                                   | 0.026                             |

|         |          |         |            |       |      |       |
|---------|----------|---------|------------|-------|------|-------|
| C47-H48 | $\sigma$ | C47-C51 | $\sigma^*$ | 0.51  | 0.95 | 0.02  |
| C47-H49 | $\sigma$ | C47-C51 | $\sigma^*$ | 0.51  | 0.95 | 0.02  |
| O77-C80 | $\sigma$ | C76-O77 | $\sigma^*$ | 0.51  | 1.31 | 0.023 |
| C38-C39 | $\pi$    | C44-C46 | $\pi^*$    | 24.75 | 0.3  | 0.078 |
| C31-C33 | $\pi$    | C26-C28 | $\pi^*$    | 24.5  | 0.29 | 0.076 |
| C63-C65 | $\pi$    | C58-C60 | $\pi^*$    | 24.12 | 0.29 | 0.075 |
| C50-C51 | $\pi$    | C55-C56 | $\pi^*$    | 24.02 | 0.28 | 0.074 |
| C25-N37 | $\pi$    | C9-C24  | $\pi^*$    | 23.88 | 0.36 | 0.088 |
| C8-C10  | $\pi$    | C9-C24  | $\pi^*$    | 19.84 | 0.29 | 0.068 |
| C15-C16 | $\pi$    | C13-C14 | $\pi^*$    | 16.57 | 0.31 | 0.068 |
| C92-C94 | $\pi$    | C93-C96 | $\pi^*$    | 15.78 | 0.31 | 0.063 |
| C93-C96 | $\pi$    | C55-C56 | $\pi^*$    | 11.6  | 0.32 | 0.056 |
| C73-O91 | $\pi$    | C74-C76 | $\pi^*$    | 4.76  | 0.42 | 0.043 |
| C87-N88 | $\pi$    | C89-N90 | $\pi^*$    | 0.62  | 0.47 | 0.015 |
| C89-N90 | $\pi$    | C87-N88 | $\pi^*$    | 0.59  | 0.48 | 0.015 |
| N36     | LP(1)    | C25-N37 | $\pi^*$    | 51.75 | 0.3  | 0.111 |
| N36     | LP(1)    | C9-C24  | $\pi^*$    | 34.53 | 0.32 | 0.095 |
| O106    | LP(2)    | C81-C82 | $\pi^*$    | 0.75  | 0.32 | 0.014 |
| O91     | LP(2)    | C71-C73 | $\sigma^*$ | 21.68 | 0.71 | 0.113 |
| O105    | LP(2)    | C82-C85 | $\sigma^*$ | 0.53  | 0.9  | 0.02  |
| C69-H70 | $\sigma$ | C71-C72 | $\sigma^*$ | 9.33  | 1    | 0.086 |

**Table S15:** Natural bond orbitals (NBOs) analysis of PYFD4.

| Donor( <i>i</i> ) | Type     | Acceptor( <i>j</i> ) | Typ<br>e   | <i>E</i> (2) | <i>E</i> ( <i>j</i> )- <i>E</i> ( <i>i</i> ) | <i>F</i> ( <i>i,j</i> ) |
|-------------------|----------|----------------------|------------|--------------|----------------------------------------------|-------------------------|
|                   |          |                      |            | [kcal/mol]   | [a.u.]                                       | [a.u.]                  |
| C69-H70           | $\sigma$ | C71-C72              | $\sigma^*$ | 9.44         | 1                                            | 0.087                   |
| C82-C101          | $\sigma$ | C101-N102            | $\sigma^*$ | 8.97         | 1.62                                         | 0.108                   |
| C85-C99           | $\sigma$ | C99-N100             | $\sigma^*$ | 8.84         | 1.62                                         | 0.107                   |
| C101-N102         | $\sigma$ | C82-C101             | $\sigma^*$ | 8.66         | 1.57                                         | 0.105                   |
| C75-C89           | $\sigma$ | C89-N90              | $\sigma^*$ | 8.58         | 1.62                                         | 0.106                   |
| C69-C71           | $\sigma$ | C71-C72              | $\sigma^*$ | 6.15         | 1.24                                         | 0.078                   |
| C9-C24            | $\sigma$ | N36-C58              | $\sigma^*$ | 6.05         | 1.09                                         | 0.073                   |
| C72-C75           | $\sigma$ | C75-C87              | $\sigma^*$ | 5.93         | 1.28                                         | 0.078                   |
| C69-C71           | $\sigma$ | C69-C94              | $\sigma^*$ | 5.71         | 1.31                                         | 0.077                   |
| C81-C82           | $\sigma$ | O77-C80              | $\sigma^*$ | 5.64         | 1.07                                         | 0.069                   |
| C92-H98           | $\sigma$ | C94-S95              | $\sigma^*$ | 5.52         | 0.75                                         | 0.057                   |
| C74-C78           | $\sigma$ | C78-C84              | $\sigma^*$ | 5.42         | 1.26                                         | 0.074                   |
| C84-C85           | $\sigma$ | C74-C78              | $\sigma^*$ | 5.29         | 1.23                                         | 0.072                   |
| C50-C51           | $\sigma$ | C50-C55              | $\sigma^*$ | 5.17         | 1.28                                         | 0.073                   |
| C39-H41           | $\sigma$ | C44-C46              | $\sigma^*$ | 4.94         | 1.1                                          | 0.066                   |
| C71-C73           | $\sigma$ | C73-O91              | $\sigma^*$ | 2.1          | 1.25                                         | 0.046                   |
| C71-C72           | $\sigma$ | C71-C73              | $\sigma^*$ | 1.02         | 1.12                                         | 0.03                    |
| C47-H48           | $\sigma$ | C47-C51              | $\sigma^*$ | 0.51         | 0.95                                         | 0.02                    |
| C47-H49           | $\sigma$ | C46-C47              | $\sigma^*$ | 0.51         | 0.94                                         | 0.02                    |
| C47-H49           | $\sigma$ | C47-C51              | $\sigma^*$ | 0.5          | 0.95                                         | 0.02                    |
| C38-C39           | $\pi$    | C44-C46              | $\pi^*$    | 24.72        | 0.3                                          | 0.078                   |
| C31-C33           | $\pi$    | C26-C28              | $\pi^*$    | 24.47        | 0.29                                         | 0.076                   |
| C63-C65           | $\pi$    | C58-C60              | $\pi^*$    | 24.12        | 0.29                                         | 0.075                   |
| C25-N37           | $\pi$    | C9-C24               | $\pi^*$    | 23.91        | 0.36                                         | 0.088                   |



|         |          |         |            |       |      |       |
|---------|----------|---------|------------|-------|------|-------|
| C74-C76 | $\pi$    | C72-C75 | $\pi^*$    | 22.49 | 0.32 | 0.076 |
| C26-C28 | $\pi$    | C31-C33 | $\pi^*$    | 21.43 | 0.3  | 0.072 |
| C55-C56 | $\pi$    | C52-C53 | $\pi^*$    | 20.15 | 0.3  | 0.07  |
| C81-C82 | $\pi$    | C84-C85 | $\pi^*$    | 19.37 | 0.31 | 0.069 |
| C84-C85 | $\pi$    | C78-C80 | $\pi^*$    | 18.54 | 0.29 | 0.067 |
| C25-N37 | $\pi$    | C26-C28 | $\pi^*$    | 8.11  | 0.36 | 0.051 |
| C87-N88 | $\pi$    | C89-N90 | $\pi^*$    | 0.61  | 0.47 | 0.015 |
| C89-N90 | $\pi$    | C87-N88 | $\pi^*$    | 0.61  | 0.48 | 0.015 |
| N36     | LP(1)    | C25-N37 | $\pi^*$    | 51.79 | 0.3  | 0.111 |
| O77     | LP(2)    | C78-C80 | $\pi^*$    | 27.82 | 0.38 | 0.095 |
| N36     | LP(1)    | C58-C60 | $\pi^*$    | 1.19  | 0.3  | 0.017 |
| O91     | LP(2)    | C73-C76 | $\sigma^*$ | 24.11 | 0.73 | 0.12  |
| N100    | LP(1)    | C85-C99 | $\sigma^*$ | 12.32 | 1.05 | 0.101 |
| N37     | LP(1)    | N36-C58 | $\sigma^*$ | 0.68  | 0.77 | 0.021 |
| C69-H70 | $\sigma$ | C71-C72 | $\sigma^*$ | 9.44  | 1    | 0.087 |

**Table S16:** Natural bond orbitals (NBOs) analysis of **PYFD5**.

| Donor( <i>i</i> ) | Type     | Acceptor( <i>j</i> ) | Typ<br>e   | <i>E</i> (2)        | <i>E</i> ( <i>j</i> )- <i>E</i> ( <i>i</i> ) | <i>F</i> ( <i>i</i> , <i>j</i> ) |
|-------------------|----------|----------------------|------------|---------------------|----------------------------------------------|----------------------------------|
|                   |          |                      |            | [ <i>kcal/mol</i> ] | [ <i>a.u.</i> ]                              | [ <i>a.u.</i> ]                  |
| C69-H70           | $\sigma$ | C71-C72              | $\sigma^*$ | 9.48                | 1                                            | 0.087                            |
| C75-C89           | $\sigma$ | C89-N90              | $\sigma^*$ | 8.57                | 1.62                                         | 0.106                            |
| C89-N90           | $\sigma$ | C75-C89              | $\sigma^*$ | 8.39                | 1.57                                         | 0.103                            |
| C75-C87           | $\sigma$ | C87-N88              | $\sigma^*$ | 8.29                | 1.62                                         | 0.104                            |
| C78-C80           | $\sigma$ | C72-C74              | $\sigma^*$ | 7.96                | 1.18                                         | 0.087                            |
| C9-N37            | $\sigma$ | C25-C26              | $\sigma^*$ | 6.54                | 1.28                                         | 0.082                            |
| C71-C72           | $\sigma$ | C69-C71              | $\sigma^*$ | 6.11                | 1.3                                          | 0.08                             |
| C84-C85           | $\sigma$ | C82-C85              | $\sigma^*$ | 5.99                | 1.27                                         | 0.078                            |
| C81-C82           | $\sigma$ | O77-C80              | $\sigma^*$ | 5.56                | 1.07                                         | 0.069                            |
| C8-C10            | $\sigma$ | C7-C8                | $\sigma^*$ | 5.25                | 1.27                                         | 0.073                            |
| C40-C42           | $\sigma$ | C44-C50              | $\sigma^*$ | 5.00                | 1.23                                         | 0.07                             |
| C15-H18           | $\sigma$ | C5-C16               | $\sigma^*$ | 4.91                | 1.06                                         | 0.064                            |
| C55-H57           | $\sigma$ | C50-C51              | $\sigma^*$ | 4.84                | 1.1                                          | 0.065                            |
| C7-C14            | $\sigma$ | C7-C8                | $\sigma^*$ | 4.45                | 1.25                                         | 0.067                            |
| C44-C50           | $\sigma$ | C39-C46              | $\sigma^*$ | 3.92                | 1.27                                         | 0.063                            |
| C85-C99           | $\sigma$ | C81-C82              | $\sigma^*$ | 2.64                | 1.27                                         | 0.052                            |
| C25-N37           | $\sigma$ | C26-C28              | $\sigma^*$ | 1.89                | 1.42                                         | 0.046                            |
| C47-H49           | $\sigma$ | C46-C47              | $\sigma^*$ | 0.51                | 0.94                                         | 0.02                             |
| C69-H70           | $\sigma$ | C94-S95              | $\sigma^*$ | 0.51                | 0.73                                         | 0.017                            |
| C47-H49           | $\sigma$ | C47-C51              | $\sigma^*$ | 0.5                 | 0.95                                         | 0.02                             |
| C38-C39           | $\pi$    | C44-C46              | $\pi^*$    | 24.7                | 0.3                                          | 0.078                            |
| C31-C33           | $\pi$    | C26-C28              | $\pi^*$    | 24.48               | 0.29                                         | 0.076                            |
| C63-C65           | $\pi$    | C58-C60              | $\pi^*$    | 24.12               | 0.29                                         | 0.075                            |
| C25-N37           | $\pi$    | C9-C24               | $\pi^*$    | 23.92               | 0.36                                         | 0.088                            |
| C52-C53           | $\pi$    | C50-C51              | $\pi^*$    | 22.96               | 0.31                                         | 0.076                            |
| C84-C85           | $\pi$    | C81-C82              | $\pi^*$    | 21.62               | 0.3                                          | 0.073                            |
| C78-C80           | $\pi$    | C81-C82              | $\pi^*$    | 20.77               | 0.3                                          | 0.072                            |
| C31-C33           | $\pi$    | C27-C29              | $\pi^*$    | 19.59               | 0.3                                          | 0.07                             |
| C26-C28           | $\pi$    | C25-N37              | $\pi^*$    | 18.94               | 0.28                                         | 0.065                            |
| C72-C75           | $\pi$    | C72-C75              | $\pi^*$    | 1.55                | 0.33                                         | 0.02                             |

|         |          |          |            |       |      |       |
|---------|----------|----------|------------|-------|------|-------|
| C87-N88 | $\pi$    | C89-N90  | $\pi^*$    | 0.61  | 0.47 | 0.015 |
| C89-N90 | $\pi$    | C87-N88  | $\pi^*$    | 0.61  | 0.48 | 0.015 |
| O77     | LP(2)    | C74-C76  | $\pi^*$    | 34.67 | 0.39 | 0.104 |
| S95     | LP(2)    | C92-C94  | $\pi^*$    | 22.72 | 0.27 | 0.07  |
| F101    | LP(2)    | C84-C85  | $\pi^*$    | 0.91  | 0.48 | 0.02  |
| O91     | LP(2)    | C73-C76  | $\sigma^*$ | 23.86 | 0.73 | 0.119 |
| O91     | LP(2)    | C71-C73  | $\sigma^*$ | 21.73 | 0.71 | 0.113 |
| F104    | LP(1)    | C82-C100 | $\sigma^*$ | 0.5   | 1.46 | 0.024 |
| C69-H70 | $\sigma$ | C71-C72  | $\sigma^*$ | 9.48  | 1    | 0.087 |

**Table S17:** Natural bond orbitals (NBOs) analysis of **PYFD6**.

| Donor( <i>i</i> ) | Type     | Acceptor( <i>j</i> ) | Typ<br>e   | <i>E</i> (2) | <i>E</i> ( <i>j</i> )- <i>E</i> ( <i>i</i> ) | <i>F</i> ( <i>i,j</i> ) |
|-------------------|----------|----------------------|------------|--------------|----------------------------------------------|-------------------------|
|                   |          |                      |            | [kcal/mol]   | [a.u.]                                       | [a.u.]                  |
| C69-H70           | $\sigma$ | C71-C72              | $\sigma^*$ | 9.5          | 1                                            | 0.087                   |
| C75-C89           | $\sigma$ | C89-N90              | $\sigma^*$ | 8.55         | 1.61                                         | 0.105                   |
| C89-N90           | $\sigma$ | C75-C89              | $\sigma^*$ | 8.37         | 1.57                                         | 0.103                   |
| C75-C87           | $\sigma$ | C87-N88              | $\sigma^*$ | 8.27         | 1.62                                         | 0.104                   |
| C87-N88           | $\sigma$ | C75-C87              | $\sigma^*$ | 8.19         | 1.57                                         | 0.102                   |
| C71-C73           | $\sigma$ | C76-O77              | $\sigma^*$ | 7.07         | 1.02                                         | 0.076                   |
| C74-C76           | $\sigma$ | C78-C84              | $\sigma^*$ | 6.79         | 1.29                                         | 0.084                   |
| C71-C72           | $\sigma$ | C69-C71              | $\sigma^*$ | 6.11         | 1.3                                          | 0.08                    |
| C78-C84           | $\sigma$ | C74-C78              | $\sigma^*$ | 5.82         | 1.23                                         | 0.075                   |
| C69-C71           | $\sigma$ | C69-C94              | $\sigma^*$ | 5.66         | 1.3                                          | 0.077                   |
| C92-C96           | $\sigma$ | C56-C93              | $\sigma^*$ | 5.19         | 1.21                                         | 0.071                   |
| C52-C53           | $\sigma$ | C47-C51              | $\sigma^*$ | 5.05         | 1.15                                         | 0.068                   |
| C40-C42           | $\sigma$ | C44-C50              | $\sigma^*$ | 5.00         | 1.23                                         | 0.07                    |
| C15-H18           | $\sigma$ | C7-C14               | $\sigma^*$ | 4.68         | 1.09                                         | 0.064                   |
| C10-H11           | $\sigma$ | C12-C13              | $\sigma^*$ | 3.82         | 1.11                                         | 0.058                   |
| C7-C8             | $\sigma$ | C4-C5                | $\sigma^*$ | 2.67         | 1.25                                         | 0.052                   |
| C44-C50           | $\sigma$ | C55-C56              | $\sigma^*$ | 1.85         | 1.22                                         | 0.043                   |
| C47-H49           | $\sigma$ | C46-C47              | $\sigma^*$ | 0.51         | 0.94                                         | 0.02                    |
| C47-H49           | $\sigma$ | C47-C51              | $\sigma^*$ | 0.51         | 0.95                                         | 0.02                    |
| C81-H83           | $\sigma$ | C82-C1100            | $\sigma^*$ | 0.50         | 0.68                                         | 0.017                   |
| C38-C39           | $\pi$    | C44-C46              | $\pi^*$    | 24.67        | 0.3                                          | 0.078                   |
| C63-C65           | $\pi$    | C58-C60              | $\pi^*$    | 24.12        | 0.29                                         | 0.075                   |
| C25-N37           | $\pi$    | C9-C24               | $\pi^*$    | 23.91        | 0.36                                         | 0.088                   |
| C44-C46           | $\pi$    | C38-C39              | $\pi^*$    | 22.56        | 0.29                                         | 0.073                   |
| C59-C61           | $\pi$    | C63-C65              | $\pi^*$    | 21.58        | 0.3                                          | 0.072                   |
| C55-C56           | $\pi$    | C52-C53              | $\pi^*$    | 20.19        | 0.3                                          | 0.07                    |
| C69-C71           | $\pi$    | C72-C75              | $\pi^*$    | 19.48        | 0.3                                          | 0.07                    |
| C3-C4             | $\pi$    | C9-C24               | $\pi^*$    | 18.03        | 0.29                                         | 0.065                   |
| C15-C16           | $\pi$    | C5-C6                | $\pi^*$    | 16.52        | 0.31                                         | 0.068                   |
| C7-C14            | $\pi$    | C15-C16              | $\pi^*$    | 14.43        | 0.3                                          | 0.063                   |
| C74-C76           | $\pi$    | C74-C76              | $\pi^*$    | 0.72         | 0.32                                         | 0.014                   |
| C87-N88           | $\pi$    | C89-N90              | $\pi^*$    | 0.62         | 0.47                                         | 0.015                   |
| C89-N90           | $\pi$    | C87-N88              | $\pi^*$    | 0.62         | 0.48                                         | 0.015                   |
| N36               | LP(1)    | C25-N37              | $\pi^*$    | 51.78        | 0.3                                          | 0.111                   |
| S95               | LP(2)    | C93-C96              | $\pi^*$    | 27.18        | 0.28                                         | 0.078                   |
| N36               | LP(1)    | C58-C60              | $\pi^*$    | 1.20         | 0.3                                          | 0.017                   |

|       |       |         |            |       |      |       |
|-------|-------|---------|------------|-------|------|-------|
| O91   | LP(2) | C73-C76 | $\sigma^*$ | 23.55 | 0.73 | 0.119 |
| N88   | LP(1) | C75-C87 | $\sigma^*$ | 12.7  | 1.04 | 0.103 |
| Cl100 | LP(2) | C80-C81 | $\sigma^*$ | 0.56  | 0.91 | 0.02  |

**Table S18:** Natural bond orbitals (NBOs) analysis of PYFD7.

| Donor( <i>i</i> ) | Type     | Acceptor( <i>j</i> ) | Typ<br>e   | <i>E</i> (2)<br>[kcal/mol] | <i>E</i> ( <i>j</i> )- <i>E</i> ( <i>i</i> )<br>[a.u.] | <i>F</i> ( <i>i,j</i> )<br>[a.u.] |
|-------------------|----------|----------------------|------------|----------------------------|--------------------------------------------------------|-----------------------------------|
| C69-H70           | $\sigma$ | C71-C72              | $\sigma^*$ | 9.35                       | 1                                                      | 0.086                             |
| C75-C89           | $\sigma$ | C89-N90              | $\sigma^*$ | 8.52                       | 1.61                                                   | 0.105                             |
| C89-N90           | $\sigma$ | C75-C89              | $\sigma^*$ | 8.34                       | 1.57                                                   | 0.103                             |
| C75-C87           | $\sigma$ | C87-N88              | $\sigma^*$ | 8.23                       | 1.62                                                   | 0.104                             |
| C71-C73           | $\sigma$ | C76-O77              | $\sigma^*$ | 7.14                       | 1.02                                                   | 0.076                             |
| C74-C76           | $\sigma$ | C78-C84              | $\sigma^*$ | 6.72                       | 1.29                                                   | 0.083                             |
| C96-H97           | $\sigma$ | C93-S95              | $\sigma^*$ | 5.65                       | 0.75                                                   | 0.058                             |
| C25-N36           | $\sigma$ | C3-C24               | $\sigma^*$ | 4.87                       | 1.35                                                   | 0.073                             |
| C44-C50           | $\sigma$ | C42-C44              | $\sigma^*$ | 4.37                       | 1.25                                                   | 0.066                             |
| C80-C81           | $\sigma$ | C82-F100             | $\sigma^*$ | 4.1                        | 1.05                                                   | 0.059                             |
| C94-S95           | $\sigma$ | C56-C93              | $\sigma^*$ | 3.99                       | 1.18                                                   | 0.061                             |
| C74-C76           | $\sigma$ | C74-C78              | $\sigma^*$ | 3.65                       | 1.23                                                   | 0.06                              |
| C5-C16            | $\sigma$ | C3-C4                | $\sigma^*$ | 3.29                       | 1.23                                                   | 0.057                             |
| C25-N36           | $\sigma$ | N36-C58              | $\sigma^*$ | 2.92                       | 1.2                                                    | 0.053                             |
| C10-C12           | $\sigma$ | C13-H23              | $\sigma^*$ | 2.58                       | 1.13                                                   | 0.048                             |
| C8-C9             | $\sigma$ | C10-C12              | $\sigma^*$ | 1.95                       | 1.28                                                   | 0.045                             |
| C4-C5             | $\sigma$ | C16-H17              | $\sigma^*$ | 1.78                       | 1.1                                                    | 0.04                              |
| C47-H49           | $\sigma$ | C46-C47              | $\sigma^*$ | 0.51                       | 0.94                                                   | 0.02                              |
| C78-C84           | $\sigma$ | C74-C76              | $\sigma^*$ | 0.51                       | 1.28                                                   | 0.023                             |
| C47-H49           | $\sigma$ | C47-C51              | $\sigma^*$ | 0.50                       | 0.95                                                   | 0.02                              |
| C38-C39           | $\pi$    | C44-C46              | $\pi^*$    | 24.65                      | 0.3                                                    | 0.078                             |
| C63-C65           | $\pi$    | C58-C60              | $\pi^*$    | 24.08                      | 0.29                                                   | 0.075                             |
| C25-N37           | $\pi$    | C9-C24               | $\pi^*$    | 23.84                      | 0.36                                                   | 0.088                             |
| C5-C6             | $\pi$    | C1-C2                | $\pi^*$    | 23.75                      | 0.29                                                   | 0.075                             |
| C69-C71           | $\pi$    | C73-O91              | $\pi^*$    | 22.06                      | 0.31                                                   | 0.074                             |
| C52-C53           | $\pi$    | C55-C56              | $\pi^*$    | 21.8                       | 0.3                                                    | 0.073                             |
| C74-C76           | $\pi$    | C73-O91              | $\pi^*$    | 20.89                      | 0.33                                                   | 0.075                             |
| C81-C82           | $\pi$    | C84-C85              | $\pi^*$    | 19.17                      | 0.32                                                   | 0.07                              |
| C84-C85           | $\pi$    | C78-C80              | $\pi^*$    | 18.62                      | 0.3                                                    | 0.07                              |
| C5-C6             | $\pi$    | C15-C16              | $\pi^*$    | 17.24                      | 0.31                                                   | 0.069                             |
| C89-N90           | $\pi$    | C87-N88              | $\pi^*$    | 0.64                       | 0.48                                                   | 0.016                             |
| C74-C76           | $\pi$    | C74-C76              | $\pi^*$    | 0.63                       | 0.32                                                   | 0.013                             |
| C81-C82           | $\pi$    | C81-C82              | $\pi^*$    | 0.55                       | 0.31                                                   | 0.012                             |
| C93-C96           | $\pi$    | C55-C56              | $\pi^*$    | 11.42                      | 0.32                                                   | 0.056                             |
| N36               | LP(1)    | C25-N37              | $\pi^*$    | 51.69                      | 0.3                                                    | 0.111                             |
| N36               | LP(1)    | C9-C24               | $\pi^*$    | 34.5                       | 0.32                                                   | 0.094                             |
| N36               | LP(1)    | C58-C60              | $\pi^*$    | 1.53                       | 0.3                                                    | 0.019                             |
| O91               | LP(2)    | C73-C76              | $\sigma^*$ | 23.46                      | 0.74                                                   | 0.119                             |
| N88               | LP(1)    | C75-C87              | $\sigma^*$ | 12.7                       | 1.04                                                   | 0.103                             |
| N37               | LP(1)    | N36-C58              | $\sigma^*$ | 0.68                       | 0.77                                                   | 0.021                             |

**Table S19:** Wavelength, excitation energy and oscillator strength of investigated compound **PYFR**

| NO | DFT<br>$\lambda$ (nm) | $E$ (eV) | $f_{os}$ | MO contributions                                                                                                 |
|----|-----------------------|----------|----------|------------------------------------------------------------------------------------------------------------------|
| 1  | 371.032               | 3.342    | 0.886    | H→L (90%), H→L+4 (3%)                                                                                            |
| 2  | 351.708               | 3.525    | 0.201    | H→L+1 (75%), H-2→L (5%), H→L+2 (3%), H→L+4 (5%)                                                                  |
| 3  | 333.578               | 3.717    | 0.142    | H-2→L+1 (14%), H→L+1 (13%), H→L+2 (29%), H→L+4 (13%), H-2→L (7%), H-1→L (6%), H→L+3 (3%), H→L+5 (5%), H→L+6 (4%) |
| 4  | 323.626               | 3.831    | 0.127    | H→L+2 (49%), H→L+3 (35%), H-2→L (2%), H-2→L+1 (2%), H-1→L (4%), H→L+4 (2%)                                       |
| 5  | 317.363               | 3.907    | 0.094    | H→L+2 (13%), H→L+3 (53%), H→L+4 (18%), H-1→L (9%)                                                                |

MO=molecular orbital, H=HOMO, L=LUMO,  $f_{os}$ = oscillator strength, wavelength= $\lambda$  (nm)

**Table S20:** Wavelength, excitation energy and oscillator strength of investigated compound **PYFD1**

| NO | DFT<br>$\lambda$ (nm) | $E$ (eV) | $f_{os}$ | MO contributions                                                                            |
|----|-----------------------|----------|----------|---------------------------------------------------------------------------------------------|
| 1  | 553.649               | 2.239    | 0.013    | H→L (97%)                                                                                   |
| 2  | 501.554               | 2.472    | 0.005    | H→L+1 (96%)                                                                                 |
| 3  | 497.869               | 2.490    | 0.210    | H-3→L (14%), H-2→L (25%), H-1→L (51%), H→L+1 (2%)                                           |
| 4  | 442.122               | 2.804    | 0.749    | H-2→L+1 (18%), H-1→L+1 (56%), H-5→L (3%), H-3→L+1 (8%), H-1→L (7%)                          |
| 5  | 421.328               | 2.943    | 0.197    | H-3→L (22%), H-2→L (27%), H-1→L (36%), H-4→L (4%), H-3→L+1 (2%), H-2→L+1 (3%), H-1→L+1 (2%) |
| 6  | 391.093               | 3.170    | 0.130    | H-3→L+1 (23%), H-2→L+1 (26%), H-1→L+1 (36%), H-5→L (3%), H-4→L+1 (5%)                       |

MO=molecular orbital, H=HOMO, L=LUMO,  $f_{os}$ = oscillator strength, wavelength= $\lambda$  (nm)

**Table S21:** Wavelength, excitation energy and oscillator strength of investigated compound **PYFD2**

| NO | DFT<br>$\lambda$ (nm) | $E$ (eV) | $f_{os}$ | MO contributions                                                                |
|----|-----------------------|----------|----------|---------------------------------------------------------------------------------|
| 1  | 685.981               | 1.807    | 0.008    | H→L (99%)                                                                       |
| 2  | 663.053               | 1.870    | 0.002    | H→L+1 (99%)                                                                     |
| 3  | 525.892               | 2.358    | 0.201    | H-3→L (24%), H-3→L+1 (11%), H-1→L (40%), H-2→L (8%), H-2→L+1 (2%), H-1→L+1 (7%) |
| 4  | 500.118               | 2.479    | 0.338    | H-3→L+1 (15%), H-1→L (27%), H-1→L+1 (42%), H-2→L+1 (6%), H→L+2 (3%)             |
| 5  | 484.863               | 2.557    | 0.012    | H→L+2 (97%)                                                                     |
| 6  | 468.041               | 2.649    | 0.253    | H-3→L (35%), H-1→L (26%), H-1→L+1 (22%), H-4→L (9%), H-2→L (5%)                 |

MO=molecular orbital, H=HOMO, L=LUMO,  $f_{os}$ = oscillator strength, wavelength= $\lambda$  (nm)

**Table S22:** Wavelength, excitation energy and oscillator strength of investigated compound **PYFD3** at M06/6-311G(d,p) in gaseous phase.

| NO | DFT<br>$\lambda$ (nm) | $E$ (eV) | $f_{os}$ | MO contributions |
|----|-----------------------|----------|----------|------------------|
| 1  | 697.363               | 1.778    | 0.005    | H→L (99%)        |
| 2  | 635.263               | 1.952    | 0.006    | H→L+1 (99%)      |

|   |         |       |       |                                                                                             |
|---|---------|-------|-------|---------------------------------------------------------------------------------------------|
| 3 | 533.105 | 2.326 | 0.216 | H-3→L (34%), H-2→L (10%), H-1→L (48%), H-4→L (3%)                                           |
| 4 | 489.418 | 2.533 | 0.203 | H-3→L (10%), H-3→L+1 (12%), H-1→L (20%), H-1→L+1 (43%), H-4→L (5%), H-2→L+1 (6%)            |
| 5 | 470.850 | 2.633 | 0.465 | H-3→L (25%), H-1→L (29%), H-1→L+1 (25%), H-4→L (6%), H-3→L+1 (6%), H-2→L (4%), H-2→L+1 (3%) |
| 6 | 443.656 | 2.795 | 0.013 | H-2→L (84%), H-4→L (4%), H-3→L (9%)                                                         |

MO=molecular orbital, H=HOMO, L=LUMO,  $f_{os}$ = oscillator strength, wavelength=  $\lambda$  (nm)

**Table S23:** Wavelength, excitation energy and oscillator strength of investigated compound **PYFD4** at M06/6-311G(d,p) in gaseous phase.

| NO | DFT<br>$\lambda$ (nm) | $E$ (eV) | $f_{os}$ | MO contributions                                                |
|----|-----------------------|----------|----------|-----------------------------------------------------------------|
| 1  | 671.419               | 1.847    | 0.007    | H→L (97%), H→L+1 (2%)                                           |
| 2  | 640.150               | 1.937    | 0.005    | H→L+1 (97%), H→L (2%)                                           |
| 3  | 522.897               | 2.371    | 0.183    | H-3→L (35%), H-2→L (10%), H-1→L (44%), H-4→L (3%), H-3→L+1 (3%) |
| 4  | 489.998               | 2.530    | 0.439    | H-3→L+1 (15%), H-1→L (12%), H-1→L+1 (58%), H-2→L+1 (8%)         |
| 5  | 463.336               | 2.676    | 0.294    | H-3→L (33%), H-1→L (40%), H-1→L+1 (10%), H-4→L (9%), H-2→L (4%) |
| 6  | 443.895               | 2.793    | 0.495    | H-3→L+1 (48%), H-2→L+1 (10%), H-1→L+1 (27%), H-4→L+1 (9%)       |

MO=molecular orbital, H=HOMO, L=LUMO,  $f_{os}$ = oscillator strength, wavelength=  $\lambda$  (nm)

**Table S24:** Wavelength, excitation energy and oscillator strength of investigated compound **PYFD5** at M06/6-311G(d,p) in gaseous phase.

| NO | DFT<br>$\lambda$ (nm) | $E$ (eV) | $f_{os}$ | MO contributions                                                                            |
|----|-----------------------|----------|----------|---------------------------------------------------------------------------------------------|
| 1  | 629.777               | 1.969    | 0.007    | H→L (98%)                                                                                   |
| 2  | 583.235               | 2.126    | 0.007    | H→L+1 (98%)                                                                                 |
| 3  | 512.310               | 2.420    | 0.213    | H-3→L (35%), H-2→L (12%), H-1→L (44%), H-4→L (2%), H-3→L+1 (2%)                             |
| 4  | 469.282               | 2.642    | 0.495    | H-3→L+1 (15%), H-1→L (16%), H-1→L+1 (51%), H-3→L (3%), H-2→L+1 (8%)                         |
| 5  | 447.693               | 2.769    | 0.412    | H-3→L (33%), H-1→L (35%), H-1→L+1 (10%), H-4→L (6%), H-3→L+1 (5%), H-2→L (6%), H-2→L+1 (2%) |
| 6  | 423.154               | 2.930    | 0.318    | H-3→L+1 (44%), H-1→L+1 (34%), H-4→L+1 (8%), H-2→L+1 (8%)                                    |

MO=molecular orbital, H=HOMO, L=LUMO,  $f_{os}$ = oscillator strength, wavelength=  $\lambda$  (nm)

**Table S25:** Wavelength, excitation energy and oscillator strength of investigated compound **PYFD6** at M06/6-311G(d,p) in gaseous phase.

| NO | DFT<br>$\lambda$ (nm) | $E$ (eV) | $f_{os}$ | MO contributions |
|----|-----------------------|----------|----------|------------------|
| 1  | 591.923               | 2.095    | 0.009    | H→L (98%)        |

|   |         |       |       |                                                                                                     |
|---|---------|-------|-------|-----------------------------------------------------------------------------------------------------|
| 2 | 540.943 | 2.292 | 0.011 | H→L+1 (98%)                                                                                         |
| 3 | 506.968 | 2.446 | 0.203 | H-3→L (28%), H-2→L (18%), H-1→L (46%),                                                              |
| 4 | 455.942 | 2.719 | 0.742 | H-3→L+1 (14%), H-2→L+1 (12%), H-1→L (13%),<br>H-1→L+1 (52%),                                        |
| 5 | 435.185 | 2.849 | 0.348 | H-3→L (31%), H-2→L (12%), H-1→L (37%), H-<br>4→L (5%), H-3→L+1 (5%), H-2→L+1 (3%), H-<br>1→L+1 (5%) |
| 6 | 407.588 | 3.042 | 0.207 | H-3→L+1 (36%), H-2→L+1 (13%), H-1→L+1 (38%),<br>H-4→L+1 (6%), H-1→L (2%)                            |

MO=molecular orbital, H=HOMO, L=LUMO,  $f_{os}$  = oscillator strength, wavelength=  $\lambda$  (nm)

**Table S26:** Wavelength, excitation energy and oscillator strength of investigated compound **PYFD7** at M06/6-311G(d,p) in gaseous phase.

| NO | DFT<br>$\lambda$ (nm) | $E$ (eV) | $f_{os}$ | MO contributions                                                                               |
|----|-----------------------|----------|----------|------------------------------------------------------------------------------------------------|
| 1  | 589.082               | 2.105    | 0.008    | H→L (98%)                                                                                      |
| 2  | 529.191               | 2.343    | 0.012    | H→L+1 (99%)                                                                                    |
| 3  | 510.076               | 2.431    | 0.186    | H-3→L (27%), H-2→L (18%), H-1→L (48%),                                                         |
| 4  | 451.722               | 2.745    | 0.586    | H-3→L+1 (13%), H-2→L+1 (11%), H-1→L (12%), H-<br>1→L+1 (52%), H-5→L (2%), H-3→L (4%)           |
| 5  | 436.149               | 2.843    | 0.311    | H-3→L (29%), H-2→L (12%), H-1→L (36%), H-4→L<br>(5%), H-3→L+1 (6%), H-2→L+1 (3%), H-1→L+1 (7%) |
| 6  | 403.253               | 3.075    | 0.176    | H-3→L+1 (36%), H-2→L+1 (14%), H-1→L+1 (35%),<br>H-5→L (2%), H-4→L+1 (6%)                       |

MO=molecular orbital, H=HOMO, L=LUMO,  $f_{os}$  = oscillator strength, wavelength=  $\lambda$  (nm)

**Table S27:** Wavelength, excitation energy and oscillator strength of investigated compound **PYFR** at M06/6-311G(d,p) in chloroform solvent.

| No | DFT<br>$\lambda$ (nm) | $E$ (eV) | $f_{os}$ | MO contributions                                                                                          |
|----|-----------------------|----------|----------|-----------------------------------------------------------------------------------------------------------|
| 1  | 372.347               | 3.330    | 1.124    | H→L (86%), H→L+1 (4%), H→L+2 (3%)                                                                         |
| 2  | 354.981               | 3.493    | 0.411    | H→L+1 (79%), H-2→L (3%), H-2→L+2 (3%), H→L<br>(6%), H→L+2 (6%)                                            |
| 3  | 333.443               | 3.718    | 0.283    | H-2→L (14%), H-2→L+1 (11%), H-1→L (12%), H→L+2<br>(44%), H-1→L+1 (2%), H→L+1 (6%), H→L+5 (4%)             |
| 4  | 314.274               | 3.945    | 0.387    | H-1→L (62%), H-1→L+1 (15%), H→L (2%), H→L+1<br>(4%), H→L+2 (8%)                                           |
| 5  | 300.197               | 4.130    | 0.022    | H→L+3 (78%), H-2→L (2%), H→L+4 (6%), H→L+5<br>(5%)                                                        |
| 6  | 297.160               | 4.172    | 0.031    | H-1→L+1 (47%), H-3→L (9%), H-3→L+1 (4%), H-2→L<br>(4%), H-1→L (7%), H→L+2 (6%), H→L+4 (8%), H→L+5<br>(5%) |

MO=molecular orbital, H=HOMO, L=LUMO,  $f_{os}$  = oscillator strength, wavelength=  $\lambda$  (nm)

**Table S28:** Wavelength, excitation energy and oscillator strength of investigated compound **PYFD1** at M06/6-311G(d,p) in chloroform solvent.

| No | DFT<br>$\lambda$ (nm) | $E$ (eV) | $f_{os}$ | MO contributions |
|----|-----------------------|----------|----------|------------------|
|----|-----------------------|----------|----------|------------------|

|   |         |       |       |                                                                      |
|---|---------|-------|-------|----------------------------------------------------------------------|
| 1 | 528.807 | 2.345 | 0.142 | H-2→L (10%), H-1→L (35%), H→L (53%),                                 |
| 2 | 506.906 | 2.446 | 0.082 | H-2→L (19%), H-1→L (32%), H→L (46%),                                 |
| 3 | 470.136 | 2.637 | 0.250 | H-1→L+1 (16%), H→L+1 (80%),                                          |
| 4 | 447.483 | 2.771 | 0.718 | H-2→L+1 (20%), H-1→L+1 (54%), H→L+1 (19%), H-5→L (3%)                |
| 5 | 418.089 | 2.966 | 0.061 | H-2→L (60%), H-1→L (29%), H-4→L (3%), H-3→L (2%), H-2→L+1 (3%)       |
| 6 | 385.044 | 3.220 | 0.048 | H-2→L+1 (55%), H-1→L+1 (27%), H-5→L (8%), H-4→L+1 (3%), H-3→L+1 (2%) |

MO=molecular orbital, H=HOMO, L=LUMO,  $f_{os}$  = oscillator strength, wavelength=  $\lambda$  (nm)

**Table S29:** Wavelength, excitation energy and oscillator strength of investigated compound **PYFD2** at M06/6-311G(d,p) in chloroform solvent.

| No | DFT $\lambda$ (nm) | $E$ (eV) | $f_{os}$ | MO contributions                                                                         |
|----|--------------------|----------|----------|------------------------------------------------------------------------------------------|
| 1  | 583.592            | 2.125    | 0.059    | H→L (89%), H-1→L (3%), H→L+1 (6%)                                                        |
| 2  | 568.970            | 2.179    | 0.001    | H→L+1 (89%), H-1→L+1 (3%), H→L (7%)                                                      |
| 3  | 532.327            | 2.329    | 0.248    | H-2→L (11%), H-2→L+1 (22%), H-1→L (22%), H-1→L+1 (33%), H-3→L+1 (2%), H→L+1 (4%)         |
| 4  | 500.542            | 2.477    | 0.778    | H-2→L+1 (10%), H-1→L (48%), H-1→L+1 (22%), H-2→L (9%), H-1→L+2 (3%)                      |
| 5  | 461.680            | 2.686    | 0.007    | H→L+2 (95%), H-2→L (3%)                                                                  |
| 6  | 448.487            | 2.765    | 0.154    | H-2→L (48%), H-1→L (20%), H-4→L (3%), H-3→L (6%), H-2→L+1 (6%), H-1→L+1 (9%), H→L+2 (3%) |

MO=molecular orbital, H=HOMO, L=LUMO,  $f_{os}$  = oscillator strength, wavelength=  $\lambda$  (nm)

**Table S30:** Wavelength, excitation energy and oscillator strength of investigated compound **PYFD3** at M06/6-311G(d,p) in chloroform solvent.

| No | DFT $\lambda$ (nm) | $E$ (eV) | $f_{os}$ | MO contributions                                                     |
|----|--------------------|----------|----------|----------------------------------------------------------------------|
| 1  | 582.195            | 2.130    | 0.043    | H→L (92%), H-1→L (6%)                                                |
| 2  | 540.896            | 2.292    | 0.044    | H→L+1 (95%), H-1→L+1 (3%)                                            |
| 3  | 536.125            | 2.313    | 0.237    | H-2→L (32%), H-1→L (54%), H-3→L (3%), H→L (7%)                       |
| 4  | 484.011            | 2.562    | 0.888    | H-2→L+1 (22%), H-1→L+1 (67%), H→L+1 (3%)                             |
| 5  | 448.860            | 2.762    | 0.108    | H-2→L (47%), H-1→L (35%), H-4→L (3%), H-3→L (7%), H-2→L+1 (5%)       |
| 6  | 422.131            | 2.937    | 0.124    | H-2→L+1 (54%), H-1→L+1 (27%), H-4→L+1 (4%), H-3→L+1 (7%), H-1→L (3%) |

MO=molecular orbital, H=HOMO, L=LUMO,  $f_{os}$  = oscillator strength, wavelength=  $\lambda$  (nm)

**Table S31:** Wavelength, excitation energy and oscillator strength of investigated compound **PYFD4** at M06/6-311G(d,p) in chloroform solvent.

| No | DFT $\lambda$ (nm) | $E$ (eV) | $f_{os}$ | MO contributions                               |
|----|--------------------|----------|----------|------------------------------------------------|
| 1  | 572.147            | 2.167    | 0.050    | H→L (90%), H-1→L (6%), H→L+1 (2%)              |
| 2  | 545.825            | 2.272    | 0.041    | H→L+1 (94%), H-1→L+1 (3%), H→L (2%)            |
| 3  | 529.666            | 2.341    | 0.210    | H-2→L (32%), H-1→L (54%), H-3→L (3%), H→L (7%) |

|   |         |       |       |                                                                                  |
|---|---------|-------|-------|----------------------------------------------------------------------------------|
| 4 | 487.417 | 2.544 | 0.968 | H-2→L+1 (22%), H-1→L+1 (68%), H→L+1 (3%)                                         |
| 5 | 443.133 | 2.798 | 0.111 | H-2→L (47%), H-1→L (33%), H-4→L (3%), H-3→L (6%), H-2→L+1 (7%)                   |
| 6 | 424.429 | 2.921 | 0.117 | H-2→L+1 (54%), H-1→L+1 (26%), H-4→L+1 (3%), H-3→L+1 (6%), H-2→L (3%), H-1→L (5%) |

MO=molecular orbital, H=HOMO, L=LUMO,  $f_{os}$  = oscillator strength, wavelength=  $\lambda$  (nm)

**Table S32:** Wavelength, excitation energy and oscillator strength of investigated compound **PYFD5** at M06/6-311G(d,p) in chloroform solvent.

| No | DFT<br>$\lambda$ (nm) | $E$ (eV) | $f_{os}$ | MO contributions                                                     |
|----|-----------------------|----------|----------|----------------------------------------------------------------------|
| 1  | 557.408               | 2.224    | 0.063    | H→L (88%), H-1→L (9%)                                                |
| 2  | 523.118               | 2.370    | 0.184    | H-2→L (31%), H-1→L (52%), H→L (10%),                                 |
| 3  | 514.287               | 2.411    | 0.097    | H→L+1 (93%), H-1→L+1 (5%)                                            |
| 4  | 470.243               | 2.637    | 0.926    | H-2→L+1 (22%), H-1→L+1 (66%), H→L+1 (5%)                             |
| 5  | 434.971               | 2.850    | 0.100    | H-2→L (52%), H-1→L (33%), H-4→L (3%), H-3→L (5%), H-2→L+1 (5%)       |
| 6  | 408.084               | 3.038    | 0.099    | H-2→L+1 (57%), H-1→L+1 (27%), H-4→L+1 (3%), H-3→L+1 (5%), H-1→L (3%) |

MO=molecular orbital, H=HOMO, L=LUMO,  $f_{os}$  = oscillator strength, wavelength=  $\lambda$  (nm)

**Table S33:** Wavelength, excitation energy and oscillator strength of investigated compound **PYFD6** at M06/6-311G(d,p) in chloroform solvent.

| No | DFT<br>$\lambda$ (nm) | $E$ (eV) | $f_{os}$ | MO contributions                                                     |
|----|-----------------------|----------|----------|----------------------------------------------------------------------|
| 1  | 544.818               | 2.276    | 0.090    | H-1→L (17%), H→L (77%), H-2→L (4%)                                   |
| 2  | 518.893               | 2.389    | 0.141    | H-2→L (27%), H-1→L (47%), H→L (22%),                                 |
| 3  | 494.178               | 2.509    | 0.149    | H→L+1 (90%), H-1→L+1 (8%)                                            |
| 4  | 461.577               | 2.686    | 0.968    | H-2→L+1 (22%), H-1→L+1 (62%), H-5→L (2%), H→L+1 (9%)                 |
| 5  | 427.856               | 2.898    | 0.081    | H-2→L (56%), H-1→L (31%), H-4→L (3%), H-3→L (3%), H-2→L+1 (4%)       |
| 6  | 397.998               | 3.115    | 0.089    | H-2→L+1 (58%), H-1→L+1 (27%), H-5→L (2%), H-4→L+1 (3%), H-3→L+1 (4%) |

MO=molecular orbital, H=HOMO, L=LUMO,  $f_{os}$  = oscillator strength, wavelength=  $\lambda$  (nm)

**Table S34:** Wavelength, excitation energy and oscillator strength of investigated compound **PYFD7** at M06/6-311G(d,p) in chloroform solvent.

| No | DFT<br>$\lambda$ (nm) | $E$ (eV) | $f_{os}$ | MO contributions                                               |
|----|-----------------------|----------|----------|----------------------------------------------------------------|
| 1  | 541.345               | 2.290    | 0.104    | H-1→L (24%), H→L (67%), H-2→L (7%)                             |
| 2  | 517.463               | 2.396    | 0.115    | H-2→L (24%), H-1→L (41%), H→L (32%),                           |
| 3  | 481.174               | 2.577    | 0.174    | H-1→L+1 (11%), H→L+1 (86%),                                    |
| 4  | 453.922               | 2.731    | 0.782    | H-2→L+1 (21%), H-1→L+1 (59%), H→L+1 (13%), H-5→L (3%)          |
| 5  | 426.664               | 2.906    | 0.061    | H-2→L (58%), H-1→L (31%), H-4→L (3%), H-3→L (3%), H-2→L+1 (3%) |



6 391.327 3.168 0.069 H-2→L+1 (58%), H-1→L+1 (27%), H-5→L (4%), H-4→L+1 (3%), H-3→L+1 (3%)

MO=molecular orbital, H=HOMO, L=LUMO,  $f_{os}$ = oscillator strength, wavelength=  $\lambda$  (nm)

**Table S35:** Dipole polarizability and major contributing tensors ( $D$ ) of the studied compounds (**PYFR** and **PYFD1-PYFD7**).

| System       | $\mu_x$ | $\mu_y$ | $\mu_z$ | $\mu_{total}$ |
|--------------|---------|---------|---------|---------------|
| <b>PYFR</b>  | -1.961  | 5.801   | 0.217   | 6.127         |
| <b>PYFD1</b> | 1.418   | -9.884  | 0.732   | 10.013        |
| <b>PYFD2</b> | -10.834 | -10.973 | 4.495   | 16.062        |
| <b>PYFD3</b> | -12.854 | -10.894 | 5.677   | 17.780        |
| <b>PYFD4</b> | -11.423 | -10.697 | 5.028   | 16.438        |
| <b>PYFD5</b> | 7.040   | 10.473  | 3.533   | 13.105        |
| <b>PYFD6</b> | -3.404  | -10.368 | 2.892   | 11.290        |
| <b>PYFD7</b> | 1.908   | 10.480  | 2.011   | 10.841        |

**Table S36:** Average linear polarizability  $\langle\alpha\rangle$  and major contributing tensor ( $esu$ ) of the studied compounds (**PYFR** and **PYFD1-PYFD7**).

| System       | $\alpha_{xx} \times 10^{-22}$ | $\alpha_{yy} \times 10^{-22}$ | $\alpha_{zz} \times 10^{-22}$ | $\langle\alpha\rangle \times 10^{-22}$ |
|--------------|-------------------------------|-------------------------------|-------------------------------|----------------------------------------|
| <b>PYFR</b>  | 1.589                         | 1.187                         | 4.380                         | 1.072                                  |
| <b>PYFD1</b> | 2.723                         | 1.420                         | 1.108                         | 1.750                                  |
| <b>PYFD2</b> | 2.961                         | 1.445                         | 1.176                         | 1.861                                  |
| <b>PYFD3</b> | 2.998                         | 1.482                         | 1.217                         | 1.899                                  |
| <b>PYFD4</b> | 3.019                         | 1.426                         | 1.170                         | 1.872                                  |
| <b>PYFD5</b> | 2.874                         | 1.429                         | 1.152                         | 1.819                                  |
| <b>PYFD6</b> | 2.925                         | 1.417                         | 1.160                         | 1.834                                  |
| <b>PYFD7</b> | 2.732                         | 1.417                         | 1.160                         | 1.752                                  |

**Table S37:** The computed first hyper-polarizability ( $\beta_{tot}$ ) and major contributing tensors ( $esu$ ) of (**PYFR** and **PYFD1-PYFD7**).

| First Hyper-polarizability    | <b>PYFR</b> | <b>PYFD1</b> | <b>PYFD2</b> | <b>PYFD3</b> | <b>PYFD4</b> | <b>PYFD5</b> | <b>PYFD6</b> | <b>PYFD7</b> |
|-------------------------------|-------------|--------------|--------------|--------------|--------------|--------------|--------------|--------------|
| $\beta_{xxx} \times 10^{-28}$ | 0.272       | -1.437       | -4.049       | -3.328       | -3.501       | 2.733        | -1.749       | 1.568        |
| $\beta_{xxy} \times 10^{-29}$ | 0.096       | -4.215       | -9.629       | -8.181       | -9.345       | 7.201        | -5.706       | 4.412        |
| $\beta_{xyy} \times 10^{-29}$ | -1.101      | -2.438       | -3.593       | -3.049       | -3.738       | 2.892        | -2.815       | 2.422        |
| $\beta_{yyy} \times 10^{-29}$ | -0.243      | -1.567       | -1.616       | -1.404       | -1.704       | 1.408        | -1.496       | 1.501        |
| $\beta_{xxz} \times 10^{-29}$ | 0.105       | -4.968       | -8.041       | -7.396       | -6.976       | -6.020       | -5.533       | -5.652       |
| $\beta_{yyz} \times 10^{-30}$ | -0.412      | -5.263       | -5.869       | -5.131       | -6.054       | -5.139       | -4.941       | -5.185       |
| $\beta_{xzz} \times 10^{-29}$ | 0.0166      | -1.552       | -2.808       | -2.596       | -2.408       | 2.092        | -1.672       | 1.786        |
| $\beta_{yzz} \times 10^{-30}$ | -0.682      | -3.784       | -6.896       | -5.611       | -6.401       | 5.306        | -4.544       | 4.201        |
| $\beta_{zzz} \times 10^{-30}$ | 0.0143      | -7.662       | -11.94       | -13.80       | -10.97       | -11.55       | -9.762       | -9.078       |
| $\beta_{tot} \times 10^{-28}$ | 0.1650      | 2.036        | 4.937        | 4.128        | 4.365        | 3.445        | 2.431        | 2.204        |

**Table S38:** Second hyper-polarizability ( $\gamma_{tot}$ ) and major contributing tensor ( $esu$ ) of the studied compounds (**PYFR** and **PYFD1-PYFD7**).

| System      | $\gamma_x \times 10^{-33}$ | $\gamma_y \times 10^{-34}$ | $\gamma_z \times 10^{-34}$ | $\gamma_{tot} \times 10^{-33}$ |
|-------------|----------------------------|----------------------------|----------------------------|--------------------------------|
| <b>PYFR</b> | 1.025                      | 0.4847                     | 0.03492                    | 1.077                          |

|              |       |       |       |       |
|--------------|-------|-------|-------|-------|
| <b>PYFD1</b> | 2.574 | 2.278 | 1.185 | 2.921 |
| <b>PYFD2</b> | 4.180 | 2.735 | 1.772 | 4.631 |
| <b>PYFD3</b> | 3.609 | 2.432 | 1.647 | 4.017 |
| <b>PYFD4</b> | 3.841 | 2.717 | 1.572 | 4.269 |
| <b>PYFD5</b> | 3.157 | 2.294 | 1.429 | 3.529 |
| <b>PYFD6</b> | 3.095 | 2.383 | 1.338 | 3.467 |
| <b>PYFD7</b> | 2.664 | 2.264 | 1.279 | 3.018 |

**Table S39:** Frequency dependent First hyperpolarizability (*esu*) of studied comp. **PYFR** and **PYFD1-PYFD7**.

| Parameters                          | Frequency $\omega$ | <b>PYFR</b><br>$\times 10^{-29}$ | <b>PYFD1</b><br>$\times 10^{-28}$ | <b>PYFD2</b><br>$\times 10^{-28}$ | <b>PYFD3</b><br>$\times 10^{-28}$ | <b>PYFD4</b><br>$\times 10^{-28}$ | <b>PYFD5</b><br>$\times 10^{-28}$ | <b>PYFD6</b><br>$\times 10^{-28}$ | <b>PYFD7</b><br>$\times 10^{-28}$ |
|-------------------------------------|--------------------|----------------------------------|-----------------------------------|-----------------------------------|-----------------------------------|-----------------------------------|-----------------------------------|-----------------------------------|-----------------------------------|
| $\beta(-\omega; \omega, 0, 0)$      | 0.000              | 1.650                            | 2.036                             | 4.937                             | 4.128                             | 4.365                             | 3.445                             | 2.431                             | 2.204                             |
| $\beta(-2, \omega; \omega, \omega)$ | 0.000              | 1.650                            | 2.036                             | 4.937                             | 4.128                             | 4.365                             | 3.445                             | 2.431                             | 2.204                             |
| $\beta(-\omega; \omega, 0)$         | 1907.21nm          | 1.823                            | 2.118                             | 5.048                             | 4.234                             | 4.453                             | 3.502                             | 2.544                             | 2.282                             |
| $\beta(-2\omega; \omega, \omega)$   | 1907.21nm          | 2.388                            | 2.849                             | 6.904                             | 5.769                             | 6.021                             | 4.682                             | 3.503                             | 3.101                             |

**Table S40:** Frequency dependent Second hyperpolarizability (*esu*) of studied comp. **PYFR** and **PYFD1-PYFD7**.

| Parameters                            | Frequency $\omega$ | <b>PYFR</b><br>$\times 10^{-33}$ | <b>PYFD1</b><br>$\times 10^{-33}$ | <b>PYFD2</b><br>$\times 10^{-33}$ | <b>PYFD3</b><br>$\times 10^{-33}$ | <b>PYFD4</b><br>$\times 10^{-33}$ | <b>PYFD5</b><br>$\times 10^{-33}$ | <b>PYFD6</b><br>$\times 10^{-33}$ | <b>PYFD7</b><br>$\times 10^{-33}$ |
|---------------------------------------|--------------------|----------------------------------|-----------------------------------|-----------------------------------|-----------------------------------|-----------------------------------|-----------------------------------|-----------------------------------|-----------------------------------|
| $\gamma(-\omega, \omega, 0, 0)$       | 0.000              | 1.077                            | 2.921                             | 4.632                             | 4.017                             | 4.269                             | 3.529                             | 3.467                             | 3.018                             |
|                                       | 1907.21nm          | 1.008                            | 2.929                             | 4.883                             | 4.185                             | 4.430                             | 3.618                             | 3.516                             | 3.041                             |
| $\gamma(-2\omega, \omega, \omega, 0)$ | 0.000              | 1.077                            | 2.921                             | 4.632                             | 4.017                             | 4.269                             | 3.529                             | 3.467                             | 3.018                             |
|                                       | 1907.21nm          | 1.139                            | 3.779                             | 7.539                             | 6.114                             | 6.430                             | 4.998                             | 4.686                             | 3.992                             |

**Table S41:** Calculated energies ( $E_{\text{HOMO}}$ ,  $E_{\text{LUMO}}$ ) and energy gap ( $\Delta E$ ) of the entitled compounds in *eV* at DFT approach.

| Compounds    | $E_{\text{HOMO}}$ | $E_{\text{LUMO}}$ | $\Delta E$ (eV) |
|--------------|-------------------|-------------------|-----------------|
| <b>PYFR</b>  | -5.735            | -1.723            | 4.012           |
| <b>PYFD1</b> | -5.729            | -3.125            | 2.604           |
| <b>PYFD2</b> | -5.739            | -3.399            | 2.340           |
| <b>PYFD3</b> | -5.740            | -3.391            | 2.349           |
| <b>PYFD4</b> | -5.738            | -3.350            | 2.388           |
| <b>PYFD5</b> | -5.735            | -3.285            | 2.450           |
| <b>PYFD6</b> | -5.731            | -3.220            | 2.511           |
| <b>PYFD7</b> | -5.733            | -3.198            | 2.535           |

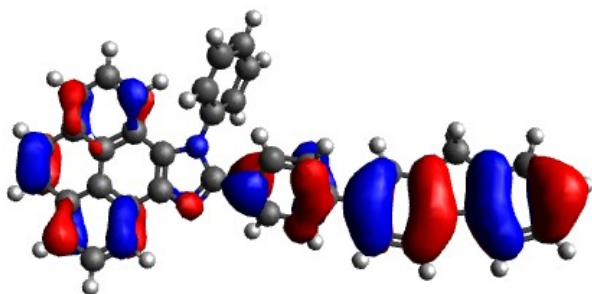

HOMO -1

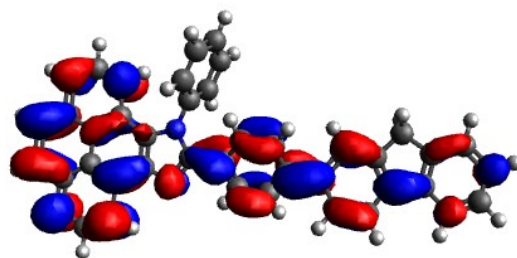

LUMO +1

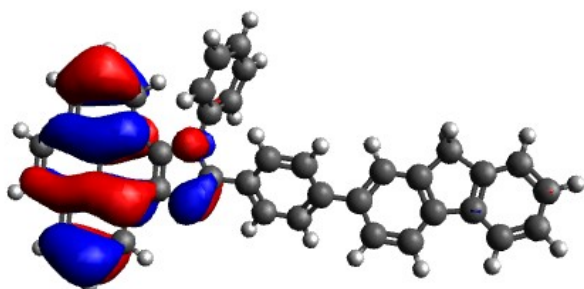

HOMO -2

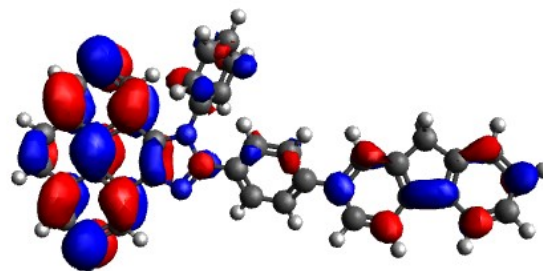

LUMO +2

PYFR

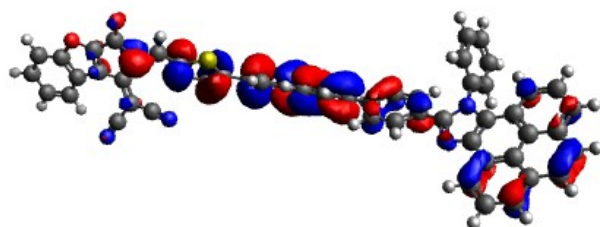

HOMO -1

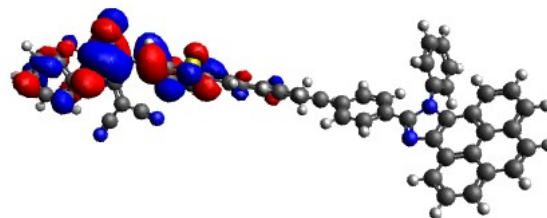

LUMO +1

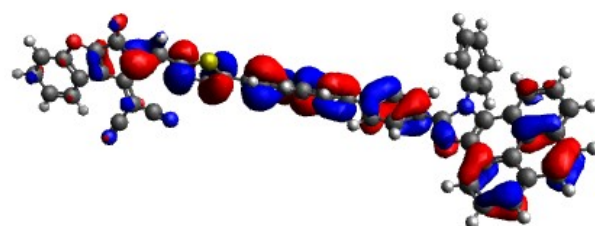

HOMO -2

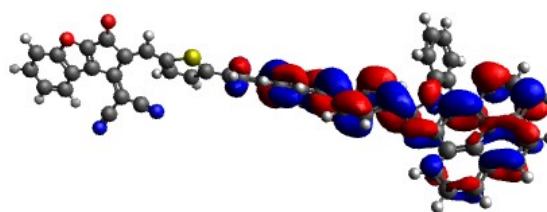

LUMO +2

PYFD1

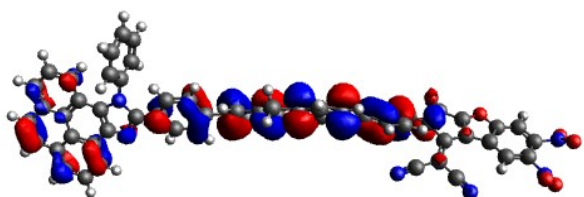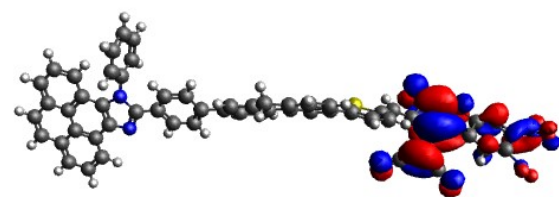

HOMO -1

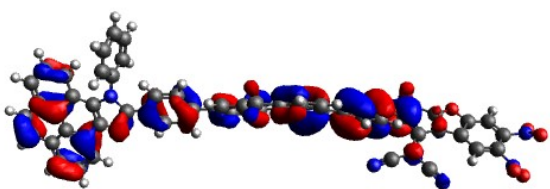

LUMO +1

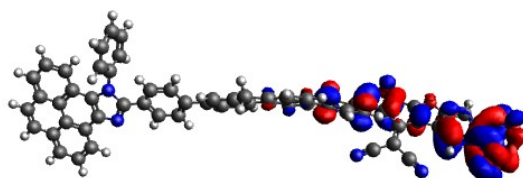

HOMO -2

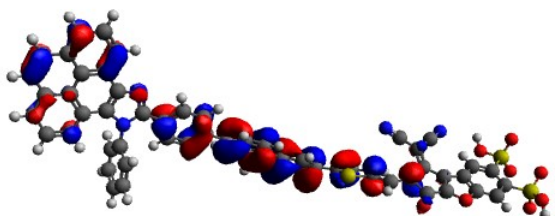

PYFD2

LUMO +2

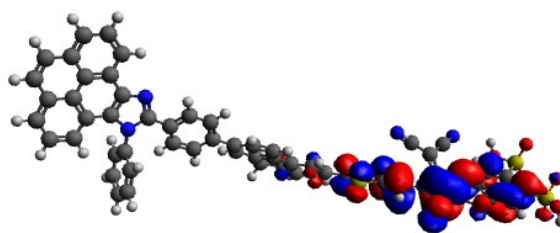

HOMO -1

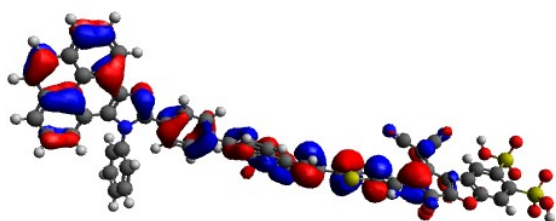

LUMO +1

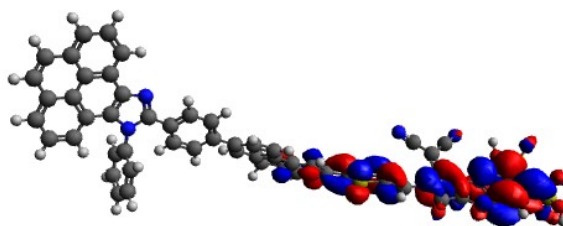

HOMO -2

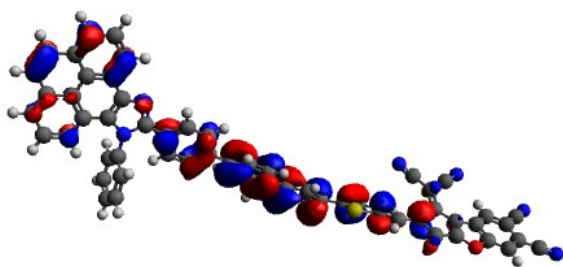

PYFD3

LUMO +2

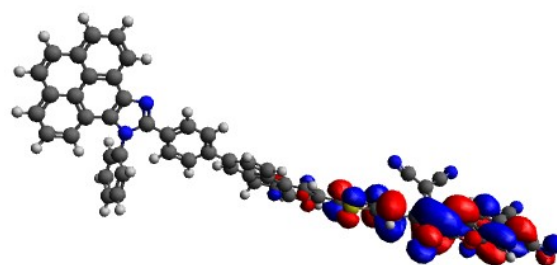

HOMO-1

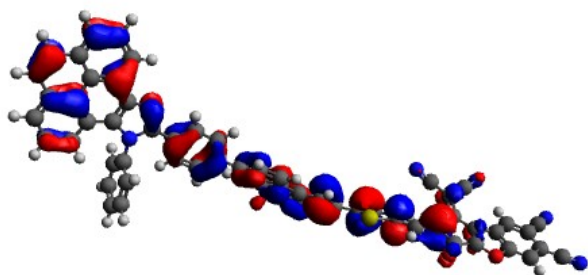

LUMO+1

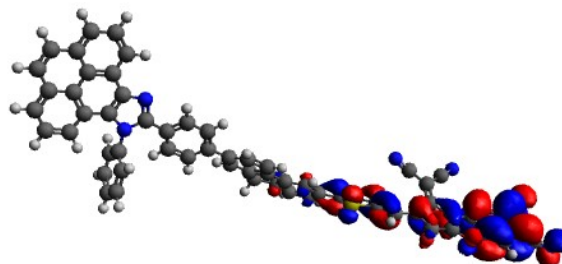

HOMO-2

PYFD4

LUMO+2

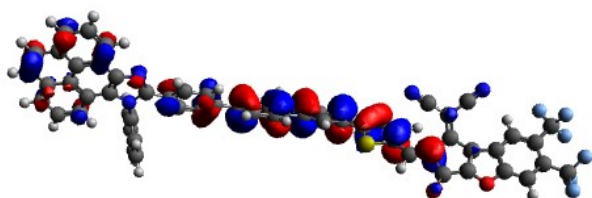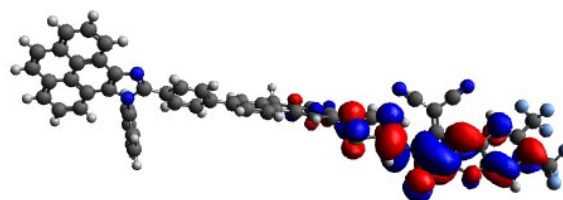

HOMO-1

LUMO+1

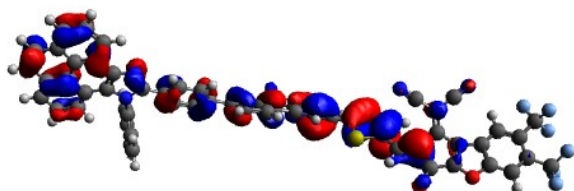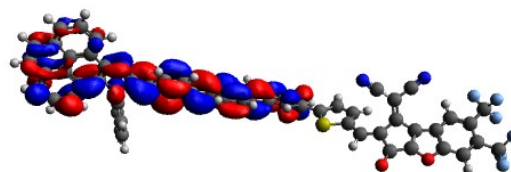

HOMO-2

PYFD5

LUMO+2

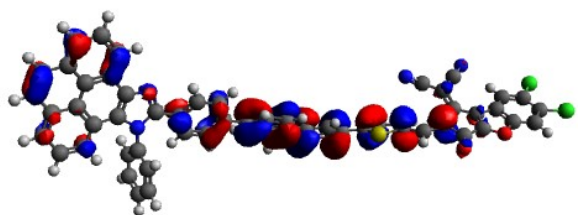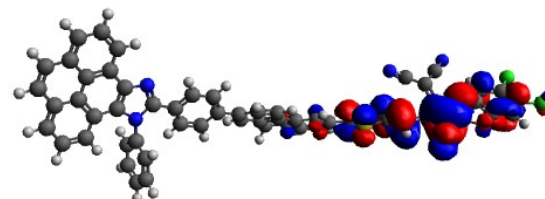

HOMO-1

LUMO+1

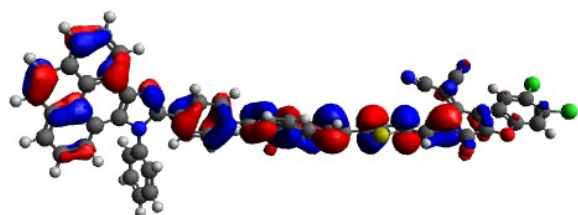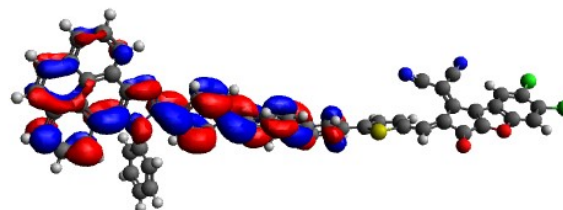

HOMO-2

PYFD6

LUMO+2

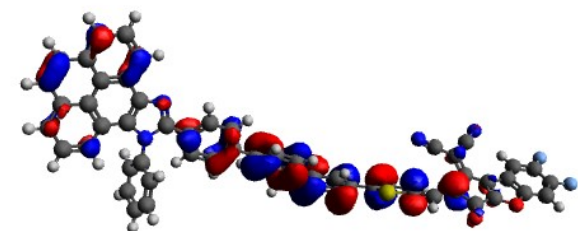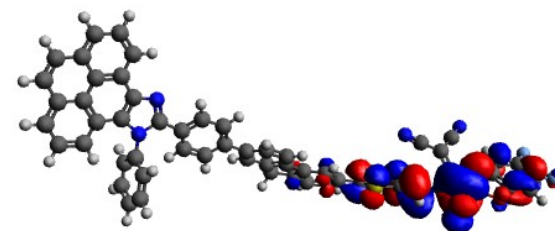

HOMO-1

LUMO+1

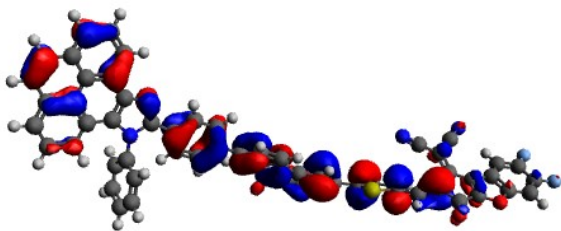

**HOMO-2**

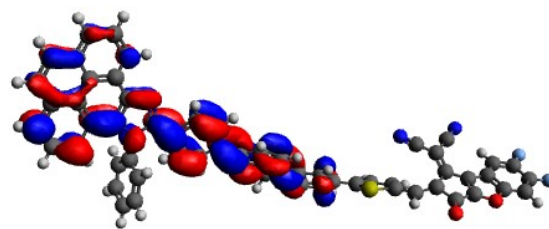

**LUMO+2**

**PYFD7**

**Figure S1:** HOMO-1/LUMO+1 and HOMO-2/LUMO+2 of **PYFR** and **PYFD1-PYFD7** compounds.
